# Supplementary material
Source: publisher figshare collection journal article supplement (https://acs.figshare.com/ndownloader/files/7784761)

## Supporting Information

### Diastereoselective Organocatalytic Addition of $\alpha$ -Angelica Lactone to $\beta$ -Halo- $\alpha$ -Ketoesters

Jessica A. Griswold,<sup>‡</sup> Matthew A. Horwitz,<sup>‡</sup> Leslie V. Leiva, Jeffrey S. Johnson\*

Department of Chemistry, University of North Carolina at Chapel Hill, Chapel Hill, North Carolina 27599-3290, United States

<sup>‡</sup>These authors contributed equally to this work.

[jsj@unc.edu](mailto:jsj@unc.edu)

| Table of Contents                                                                                | Page |
|--------------------------------------------------------------------------------------------------|------|
| Optimization of the addition of $\alpha$ -angelica lactone to $\beta$ -halo- $\alpha$ -ketoester | S2   |
| Enantioselectivity data                                                                          | S4   |
| HPLC traces                                                                                      | S5   |
| Determination of relative configuration of <b>4a</b>                                             | S6   |
| References                                                                                       | S7   |
| X-ray structure of <b>3a</b>                                                                     | S8   |
| Crude <sup>1</sup> H NMR spectra                                                                 | S9   |
| <sup>1</sup> H and <sup>13</sup> C NMR spectra of new compounds                                  | S20  |
| 2D NMR experiments on <b>4a</b>                                                                  | S42  |

### Optimization of the addition of $\alpha$ -angelica lactone to $\beta$ -halo- $\alpha$ -ketoester:

A 1 dram vial was charged sequentially with 1,3,5-trimethoxybenzene (internal standard, 0.1 mmol),  $\beta$ -halo- $\alpha$ -ketoester<sup>1</sup> (0.1 mmol, 1.0 equiv), and solvent (1.0mL). The  $\alpha$ -angelica lactone (0.2 mmol, 2.0 equiv) was then added. The reaction was stirred at room temperature for one min and the catalyst was added in one portion. The reaction was stirred at room temperature for the length of the reaction, then concentrated *in vacuo*. The <sup>1</sup>H NMR spectra of unpurified reaction mixtures were used to determine NMR yields and dr values. (**Note 1**)

**Commentary:** Initially, a screen of bases in THF (Table S1, entries 1-5) demonstrated that quinidine was the best base for the reaction. Then, by studying the reaction in different solvents (Table S1, entries 5-10), we found 2-MeTHF to be optimal. We observed that there was no improvement when the reaction time was extended to 24 h, either at -20 °C (Table S1, entry 11) or room temperature (Table S1, entry 12). Although a low level of enantioselectivity (16% ee) was observed with QN-TU (Table S2, entry 5), no enantioselectivity (0% ee) was observed with quinidine (Table S2, entry 6). In cases where the reactions worked, no minor diastereomers were observed. (**Note 2**) Optimized conditions are italicized.

**Table S1.** Base and Solvent Screen.

| Entry | Conditions                                     | % Yield ( <sup>1</sup> H NMR) | dr              |
|-------|------------------------------------------------|-------------------------------|-----------------|
| 1     | 10 mol % KO <sup>t</sup> Bu, THF, 6 h, rt      | 0                             | -               |
| 2     | 10 mol % DBU, THF, 6 h, rt                     | 0                             | -               |
| 3     | 10 mol % TEA, THF, 6 h, rt                     | Trace product                 | -               |
| 4     | 10 mol % TMG, THF, 6 h, rt                     | Trace product                 | -               |
| 5     | 10 mol % quinidine, THF, 6 h, rt               | 61                            | >20:1           |
| 6     | 10 mol % quinidine, EA, 6 h, rt                | 66                            | >20:1           |
| 7     | 10 mol % quinidine, DMSO, 6 h, rt              | 23                            | n.d.            |
| 8     | 10 mol % quinidine, TBME, 6 h, rt              | 45                            | >20:1           |
| 9     | 10 mol % quinidine, Et <sub>2</sub> O, 6 h, rt | 46                            | >20:1           |
| 10    | <i>10 mol % quinidine, 2-MeTHF, 6 h, rt</i>    | <i>91</i>                     | <i>&gt;20:1</i> |
| 11    | 10 mol % quinidine, 2-MeTHF, 24 h, -20 °C      | 43                            | >20:1           |
| 12    | 10 mol % quinidine, 2-MeTHF, 24 h, rt          | 53                            | >20:1           |

**Note 1.** We found that the reaction gives a higher NMR yield (70-80%, at least in the parent case) than the isolated yield, and after repeated tries we concluded that the products are not completely stable to silica. This conclusion was supported by the fact that new decomposition products can be observed coming off the column.

**Note 2.** In general, we started by looking in the crude NMR spectra to see if anything that could be a diastereomer could be identified. Some cases were clearer than others. The most definitive method that we found to identify diastereomers or  $\gamma$ -addition products was to flash the crude material and then flush the column with x+10% more polar solvent system (where x was the gradient that allowed the product to elute cleanly) in an EA/hexanes gradient for >10 fractions. We then concentrated all fractions on each side of the desired product (more polar and less polar) and if we found anything ( $^1\text{H}$  NMR analysis), we went back to the crude spectra and calculated the dr. It is possible that a minor diastereomer or  $\gamma$ -addition product for some cases might be not isolable due to instability (see Note 1), but this procedure was the best readout feasible with the available data.

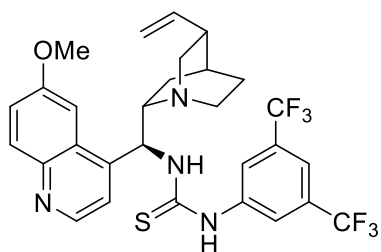

**QN-1**

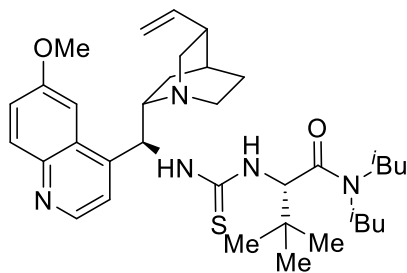

**QN-2**

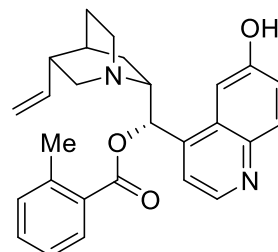

**QD-1**

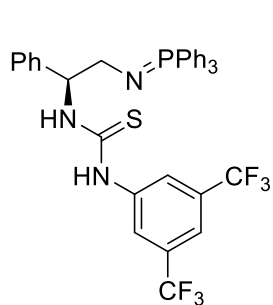

**Ph-Dixon**

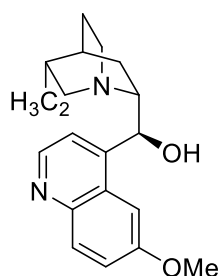

**quinidine**

**Table S2.** Enantioselectivity data for chiral catalysts.

| Entry | Conditions                                   | er        |
|-------|----------------------------------------------|-----------|
| 1     | 10 mol % <b>QN-1</b> , THF, 21 h, rt         | 58.0:42.0 |
| 2     | 10 mol % <b>QN-2</b> , THF, 6 h, rt          | 53.5:46.5 |
| 3     | 10 mol % <b>QD-1</b> , 2-MeTHF, 6 h, rt      | 54.0:42.0 |
| 4     | 10 mol % <b>Ph-Dixon</b> , THF, 19 h, rt     | 52.5:47.5 |
| 5     | 10 mol % <b>Ph-Dixon</b> , THF, 16 h, -40 °C | 55.5:44.5 |
| 6     | 10 mol % quinidine, THF, 6 h, rt             | 50.5:49.5 |

HPLC traces:

*With TEA*

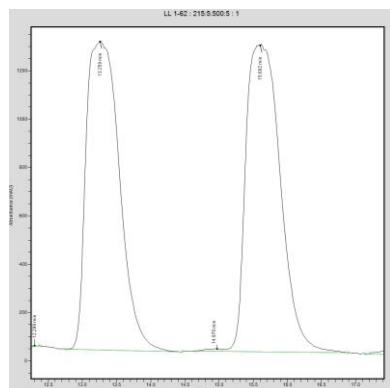

*With quinidine:*

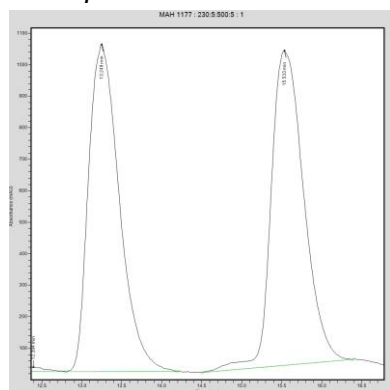

|                | Retention time (min) | Peak Area  | % Area |
|----------------|----------------------|------------|--------|
| With TEA       | 13.3                 | 43264208.8 | 49.3   |
|                | 15.6                 | 44507069.9 | 50.7   |
| With quinidine | 13.2                 | 27679403.6 | 49.5   |
|                | 15.5                 | 28248692.7 | 50.5   |

### Determination of relative configuration of **4a**:

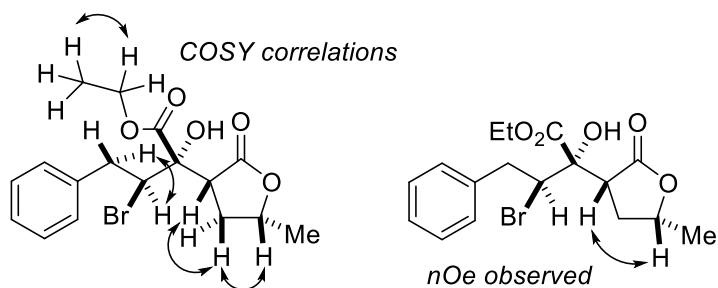

COSY and NOESY experiments were performed on **4a** (see pp. S45-S46) on a 600 MHz NMR spectrometer. COSY analysis allowed the assignment of protons in the 1D  $^1\text{H}$  NMR spectrum. A characteristic NOE correlation was observed between the indicated protons (which appear at  $\delta$  3.77 and  $\delta$  4.57), which allowed them to be assigned as *syn* on the lactone.

## References:

1. a) Steward, K. M., Corbett, M. T., Goodman, C. G., Johnson, J. S. *J. Am. Chem. Soc.* **2012**, *134*, 20197-20206. b) Corbett, M. T., Johnson, J. S. *Angew. Chem. Int. Ed.* **2014**, *53*, 255-259. c) Goodman, C. G., Johnson, J. S. *J. Am. Chem. Soc.* **2014**, *136*, 14698-14701. d) Goodman, C. G., Johnson, J. S. *J. Am. Chem. Soc.* **2015**, *137*, 122-125.

X-ray structure of **3a**:

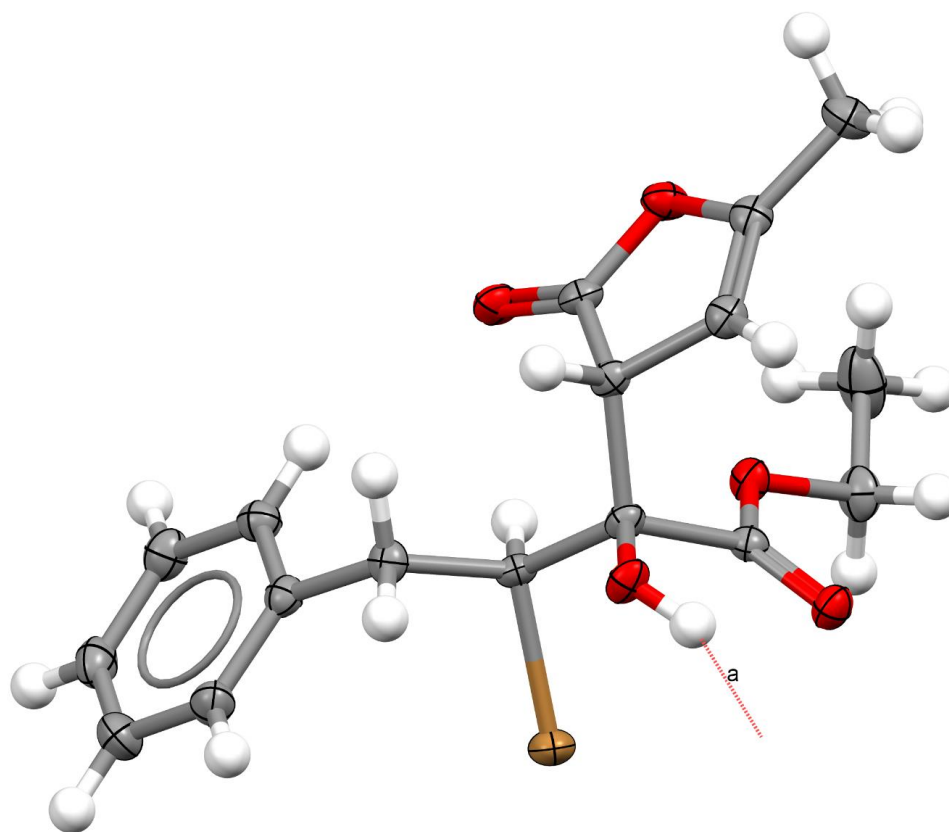

Thermal ellipsoid plot of compound **3a**. Ellipsoids drawn at 50% probability.



Crude  $^1\text{H}$  NMR spectra:

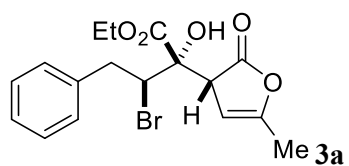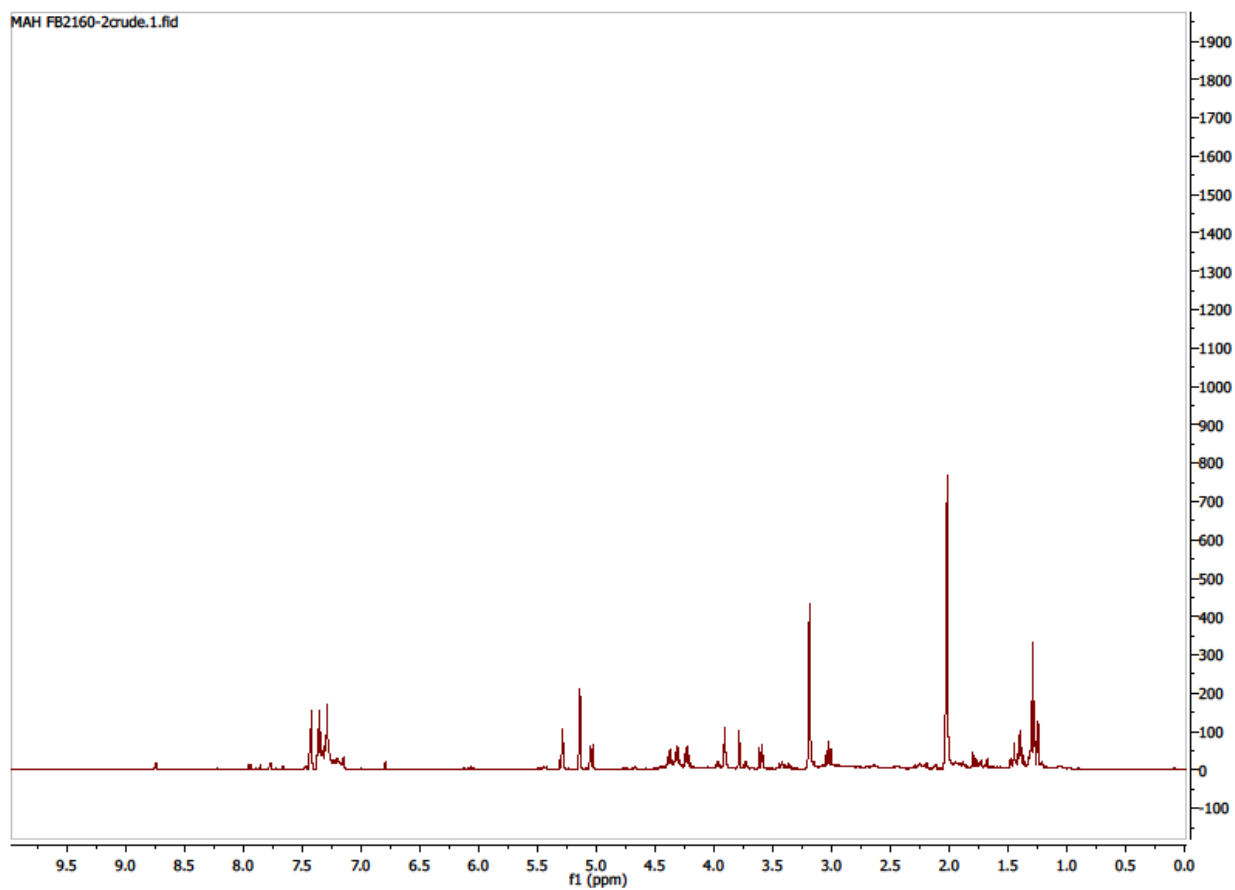

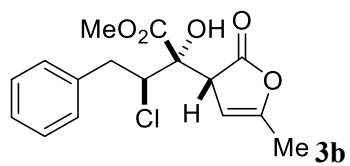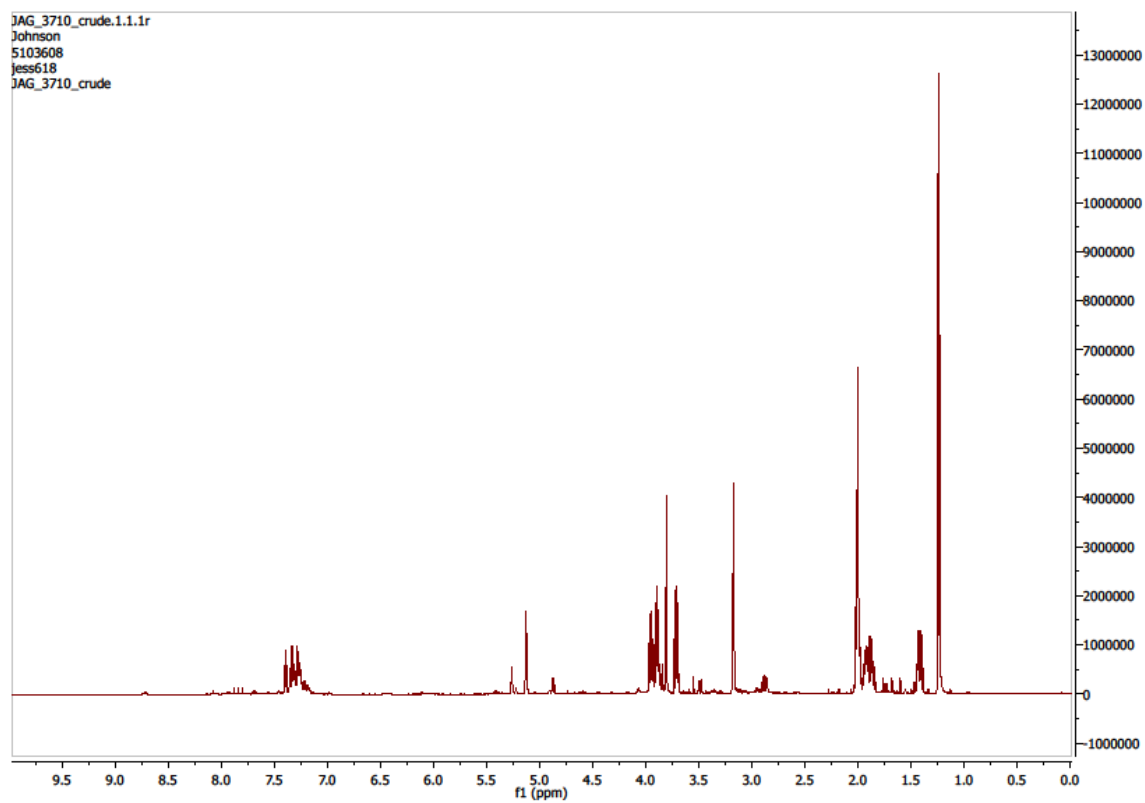

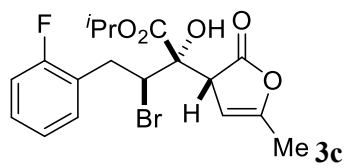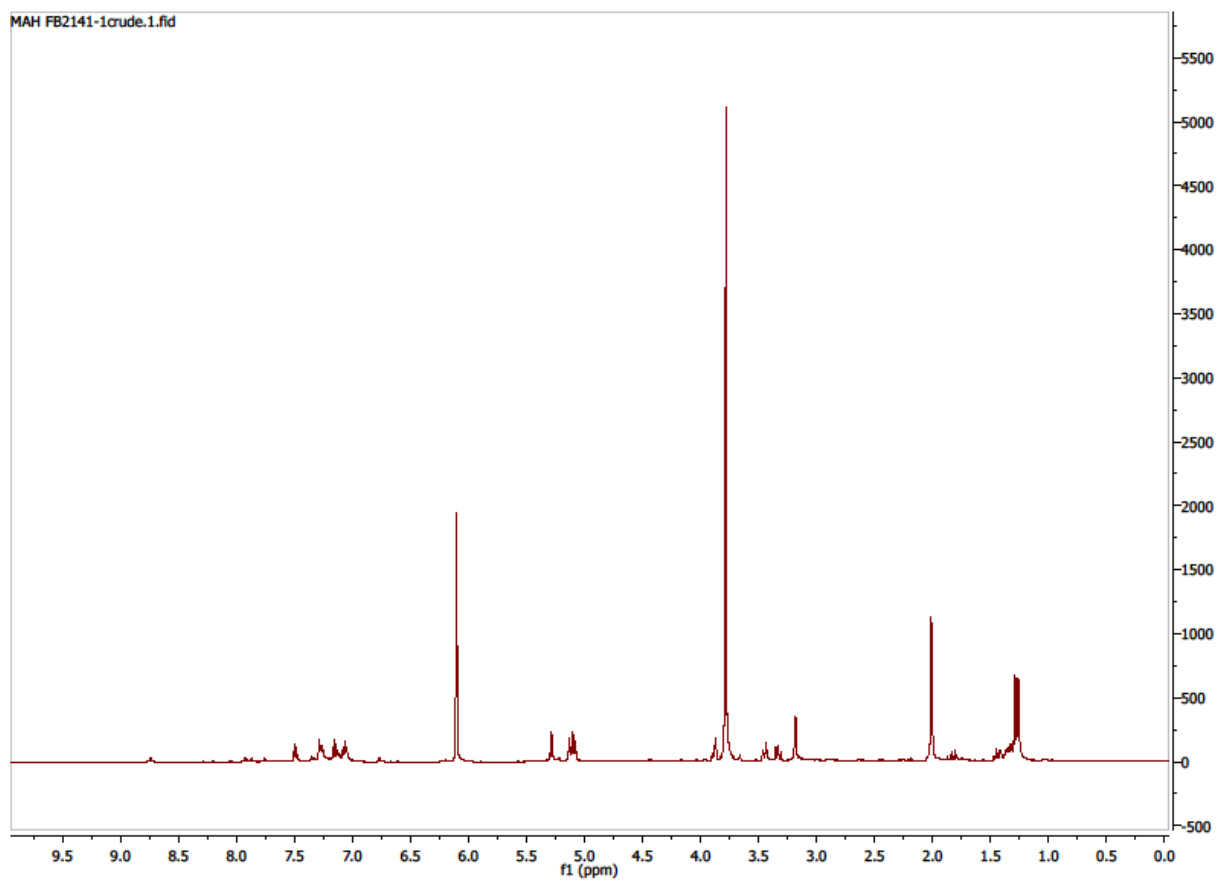

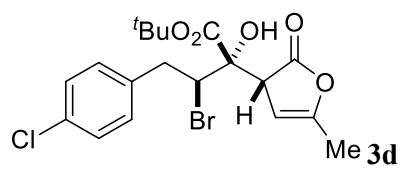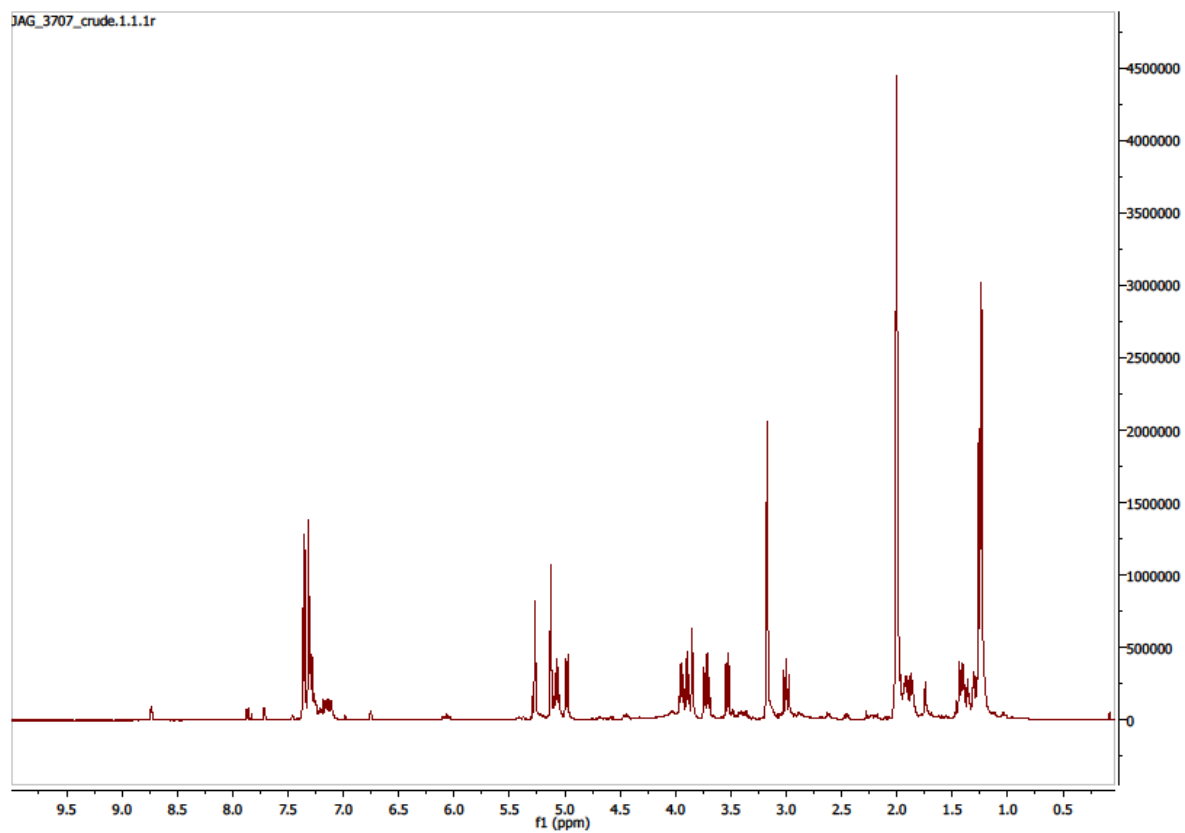

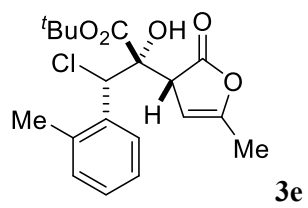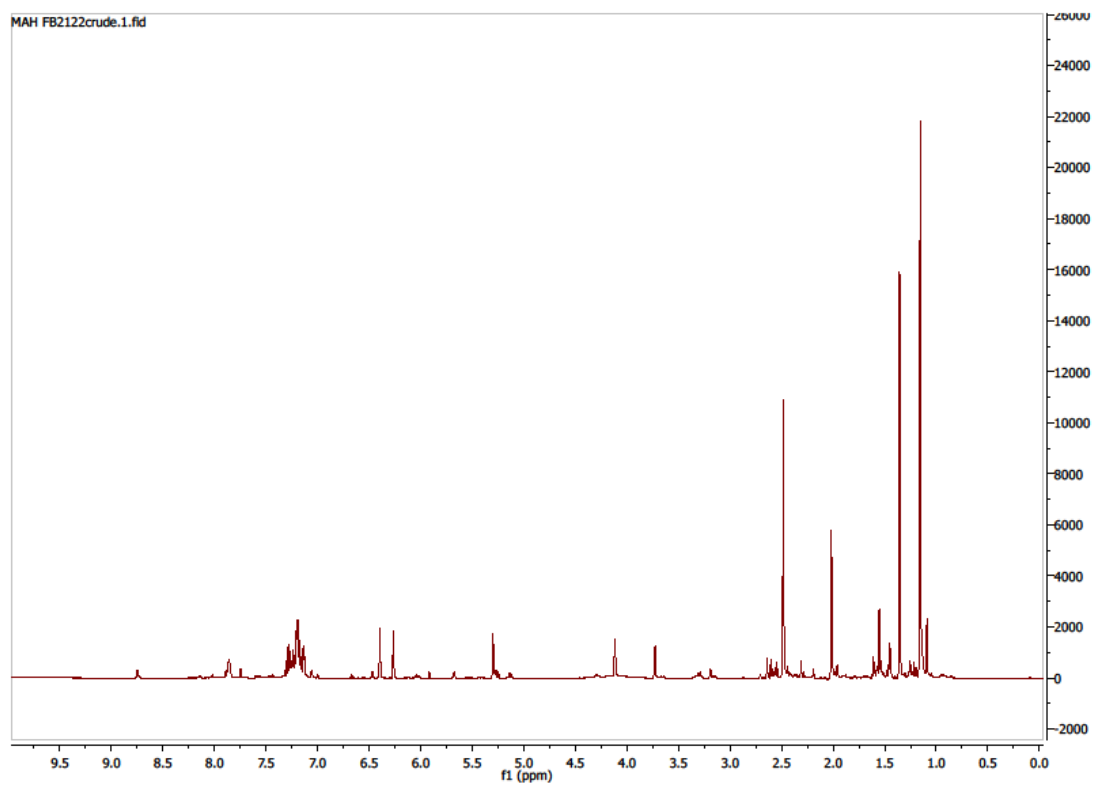

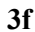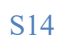

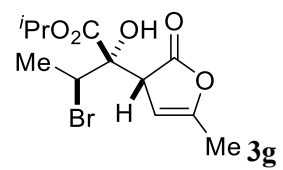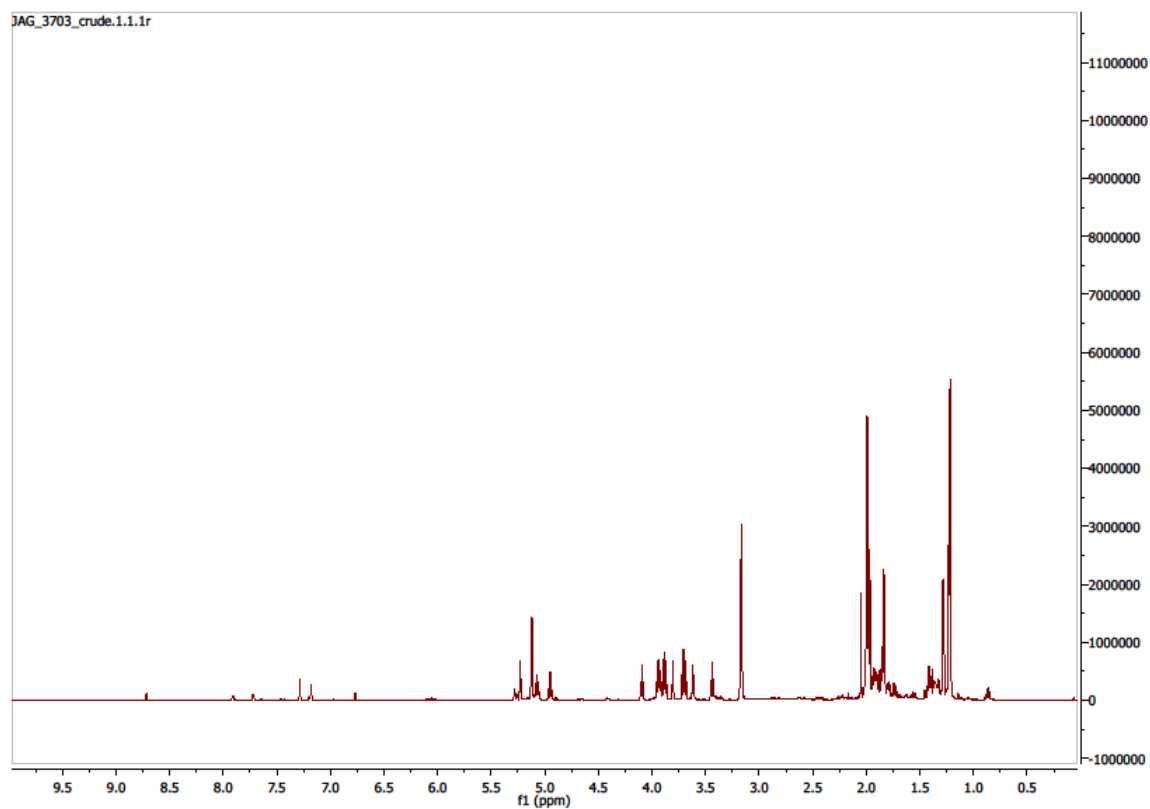

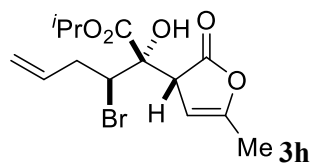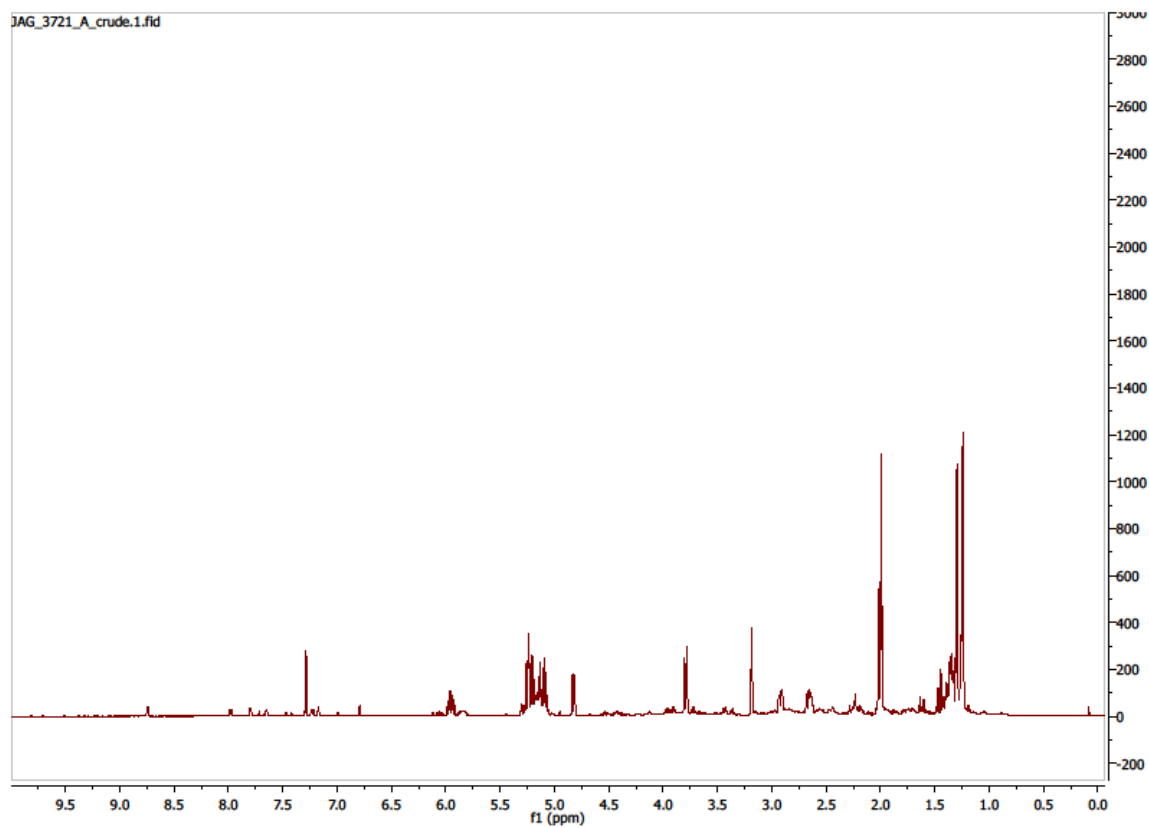



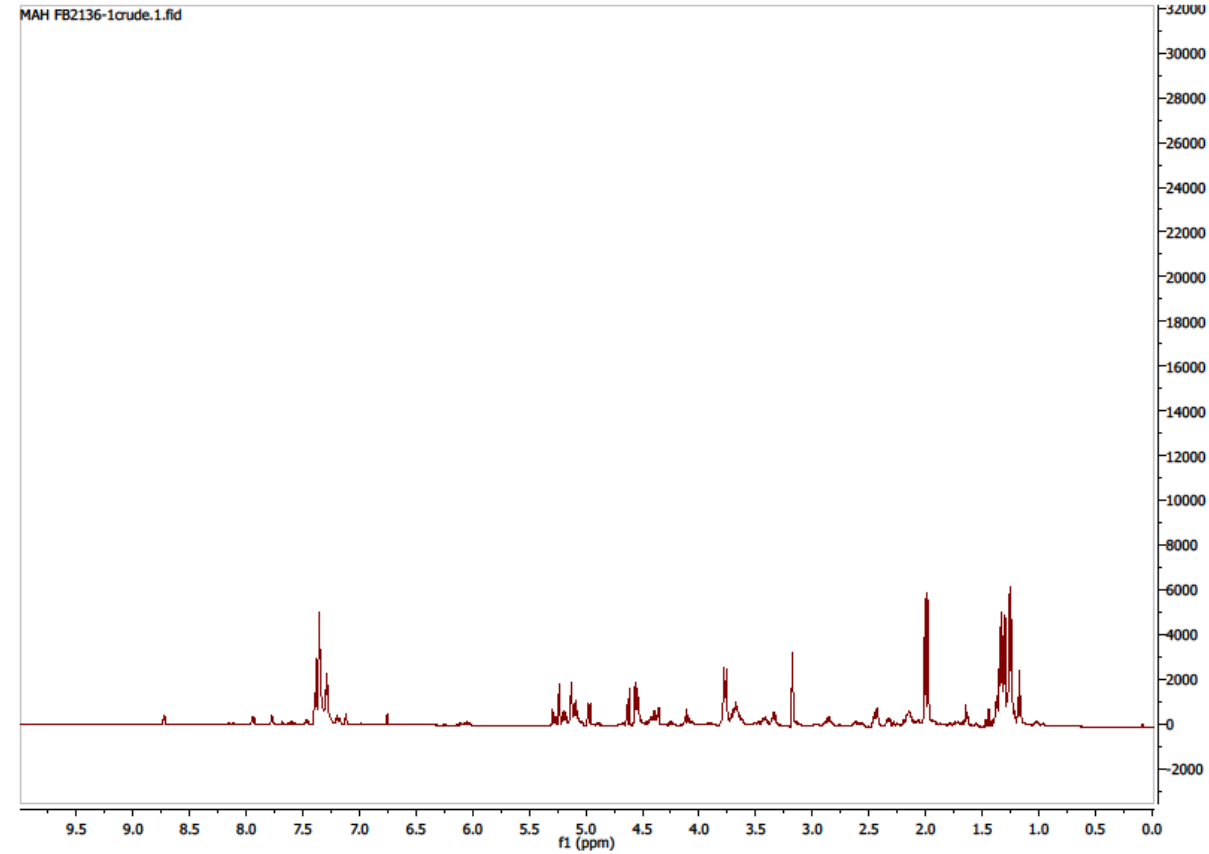

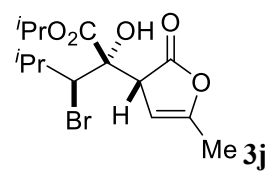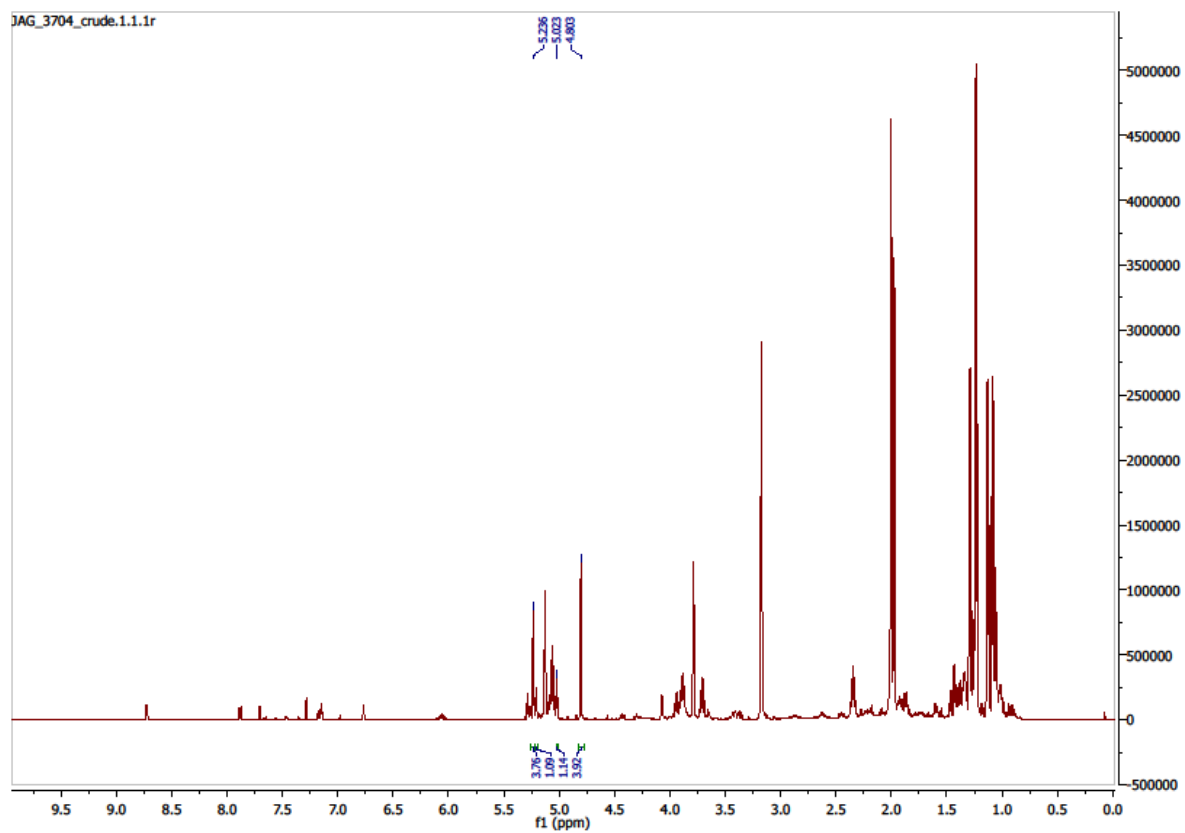

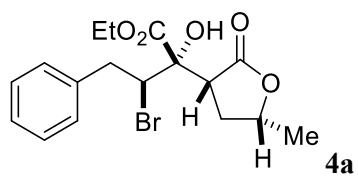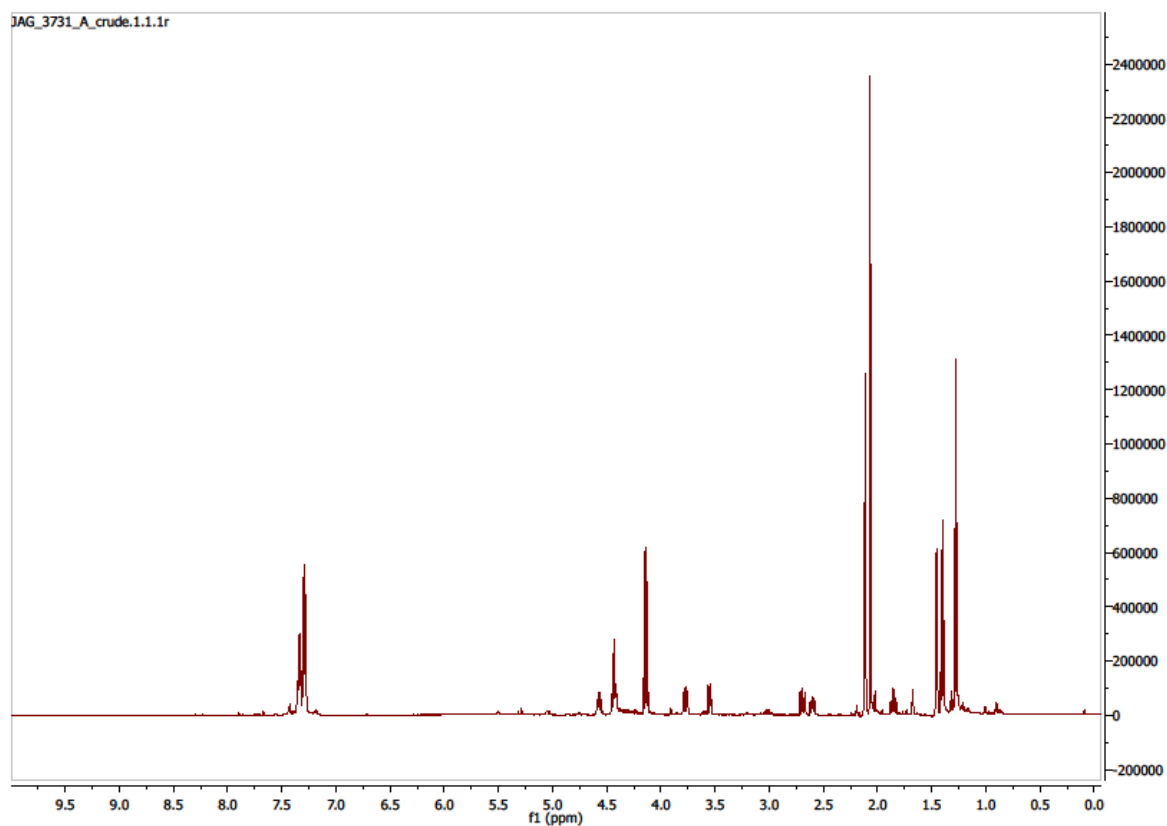

$^1\text{H}$  and  $^{13}\text{C}$  NMR spectra of new compounds:

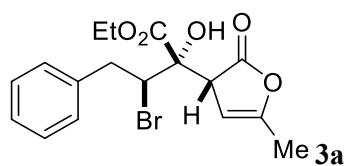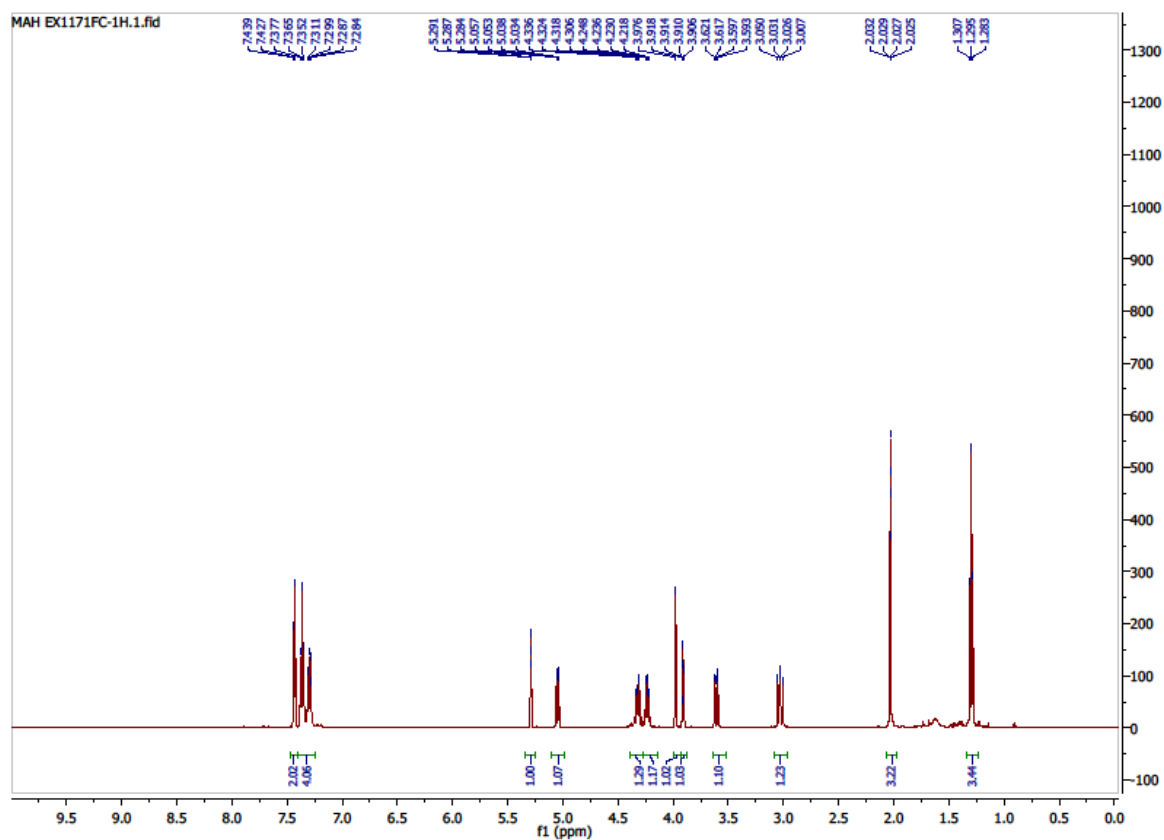

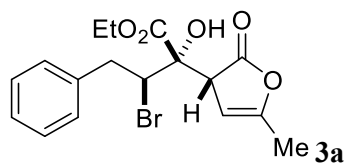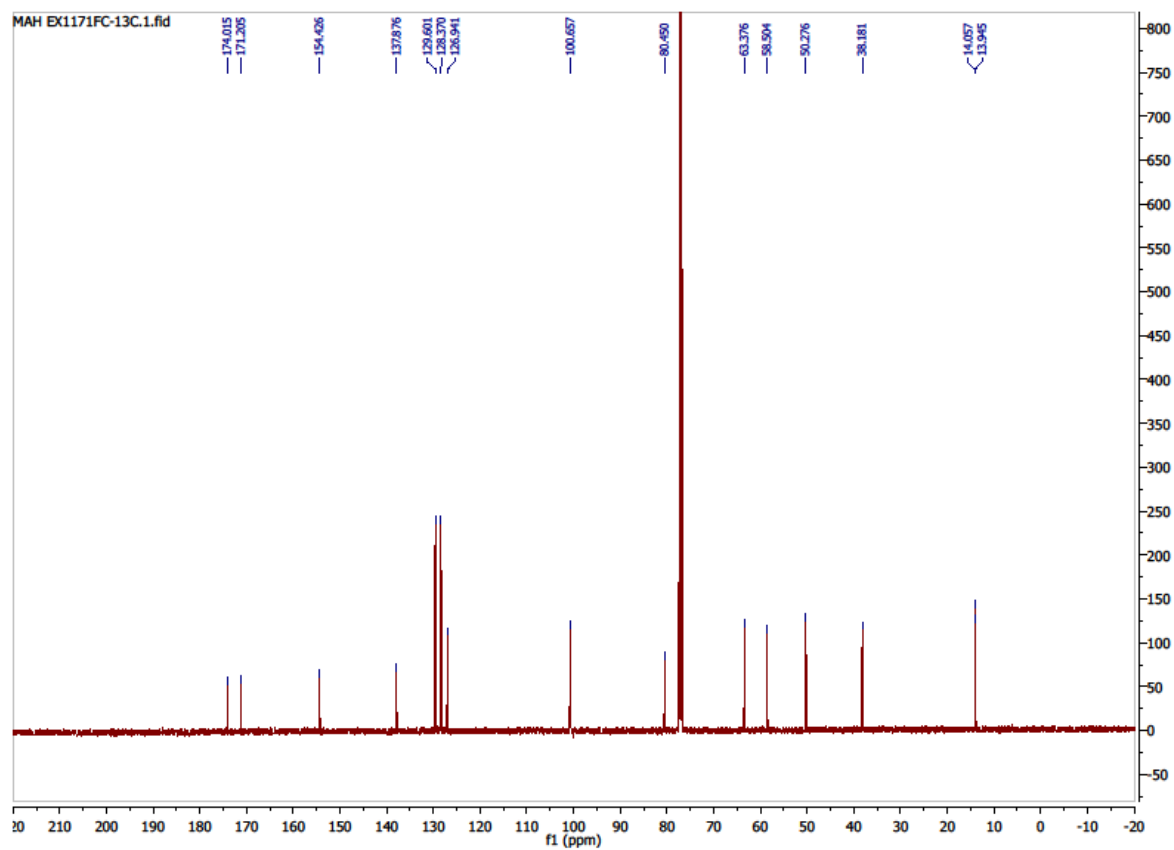

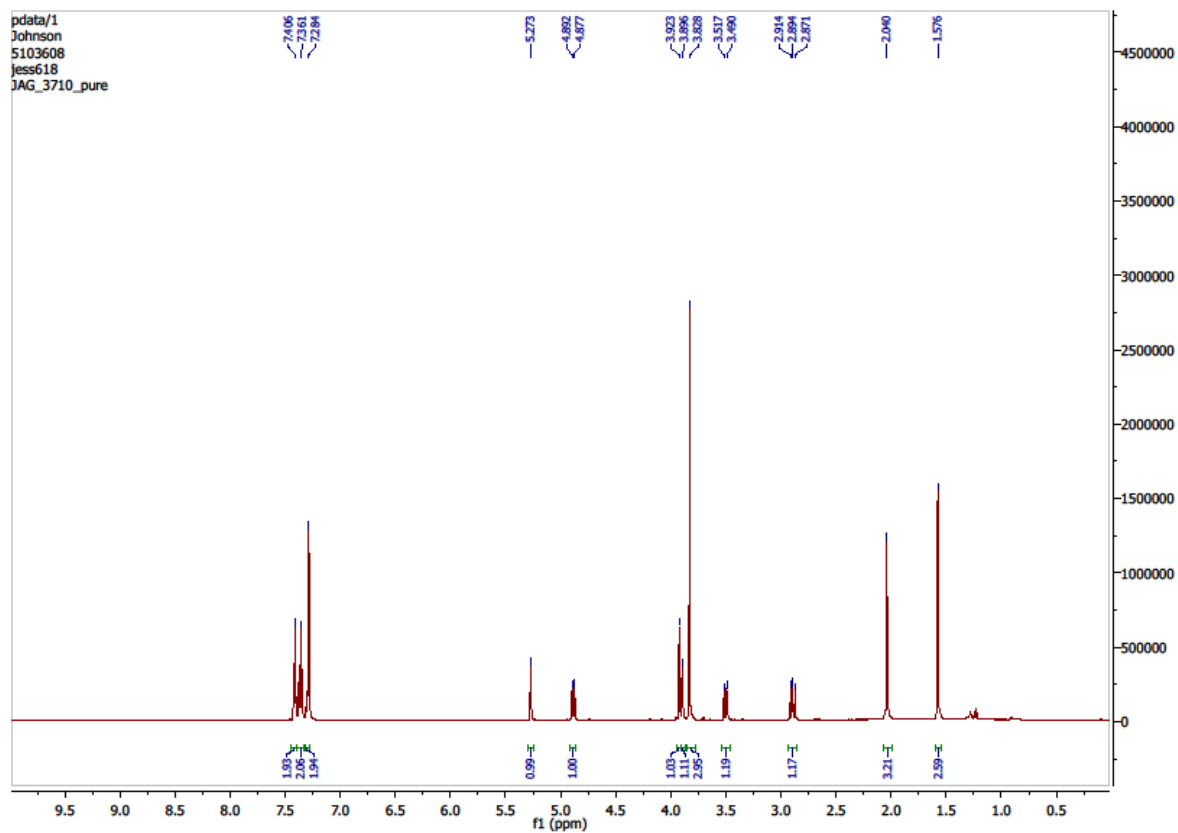

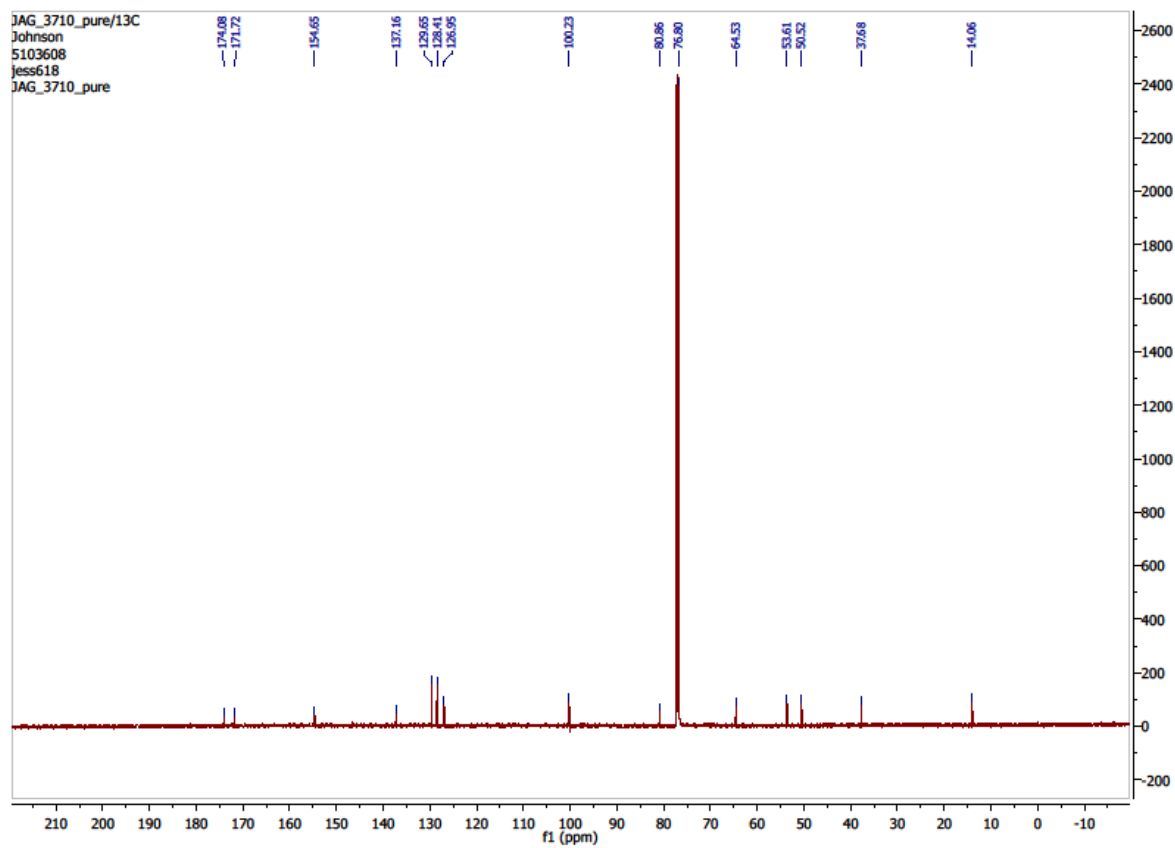

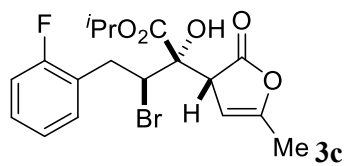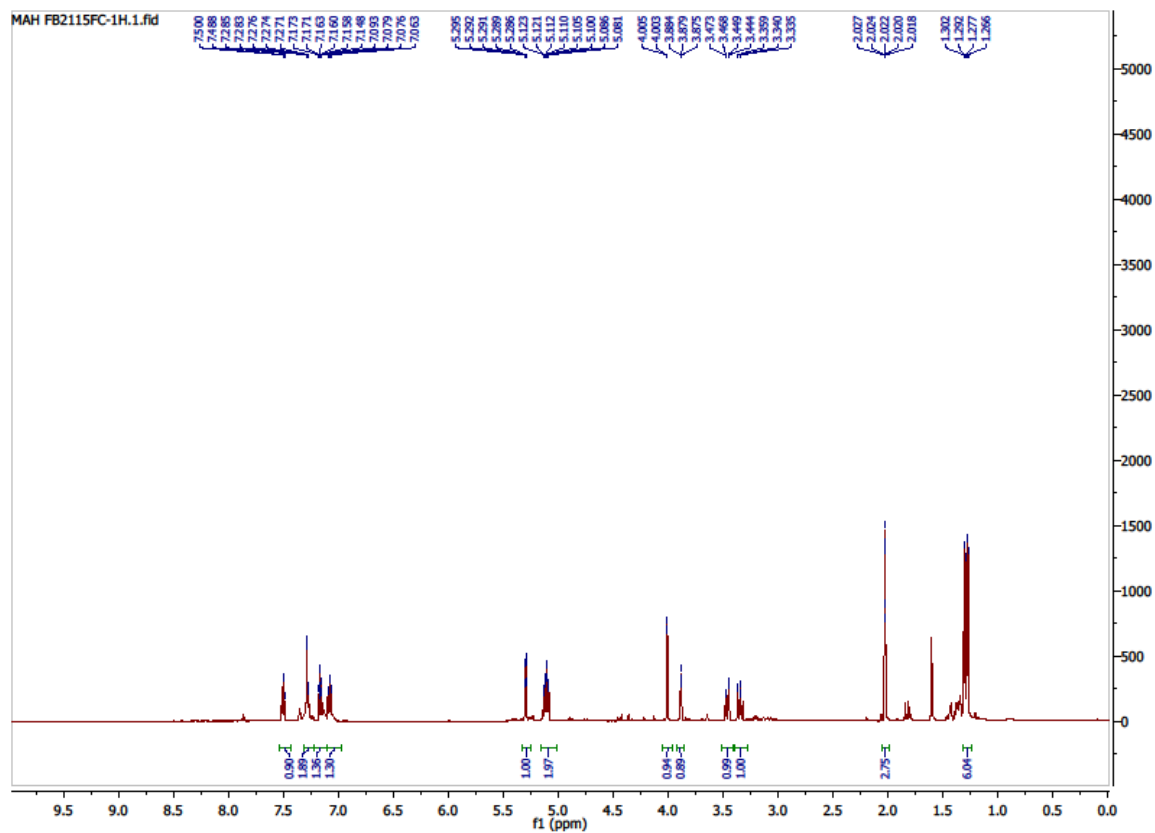



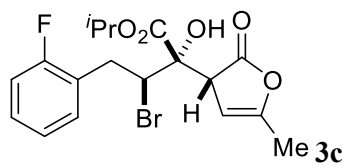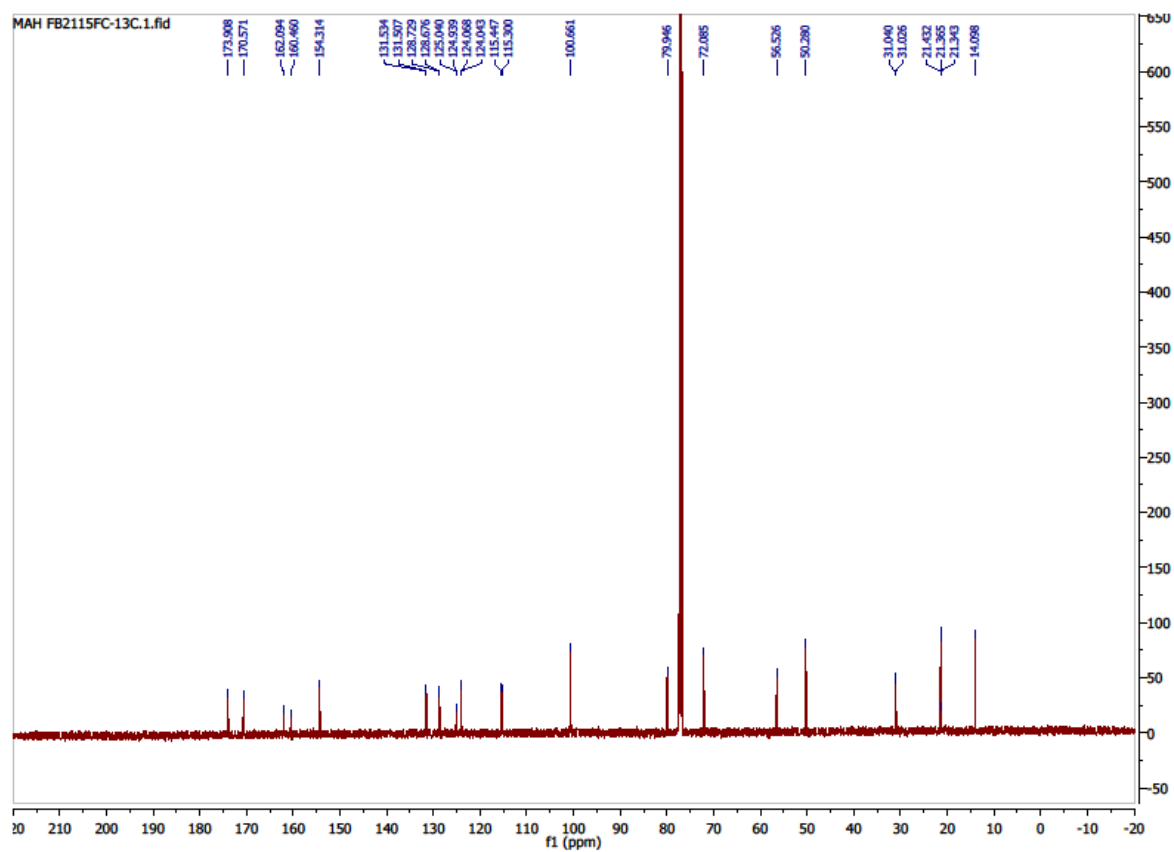

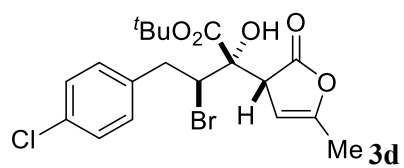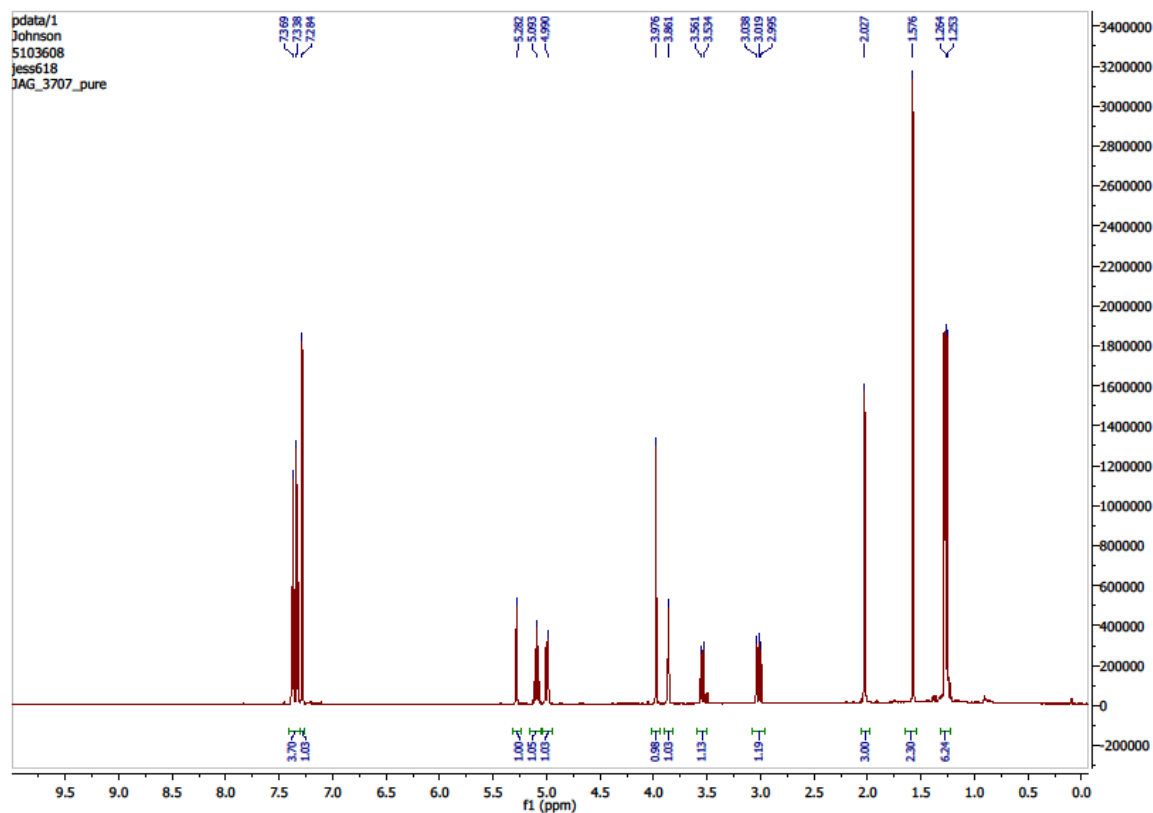

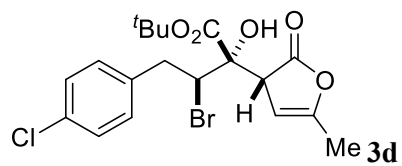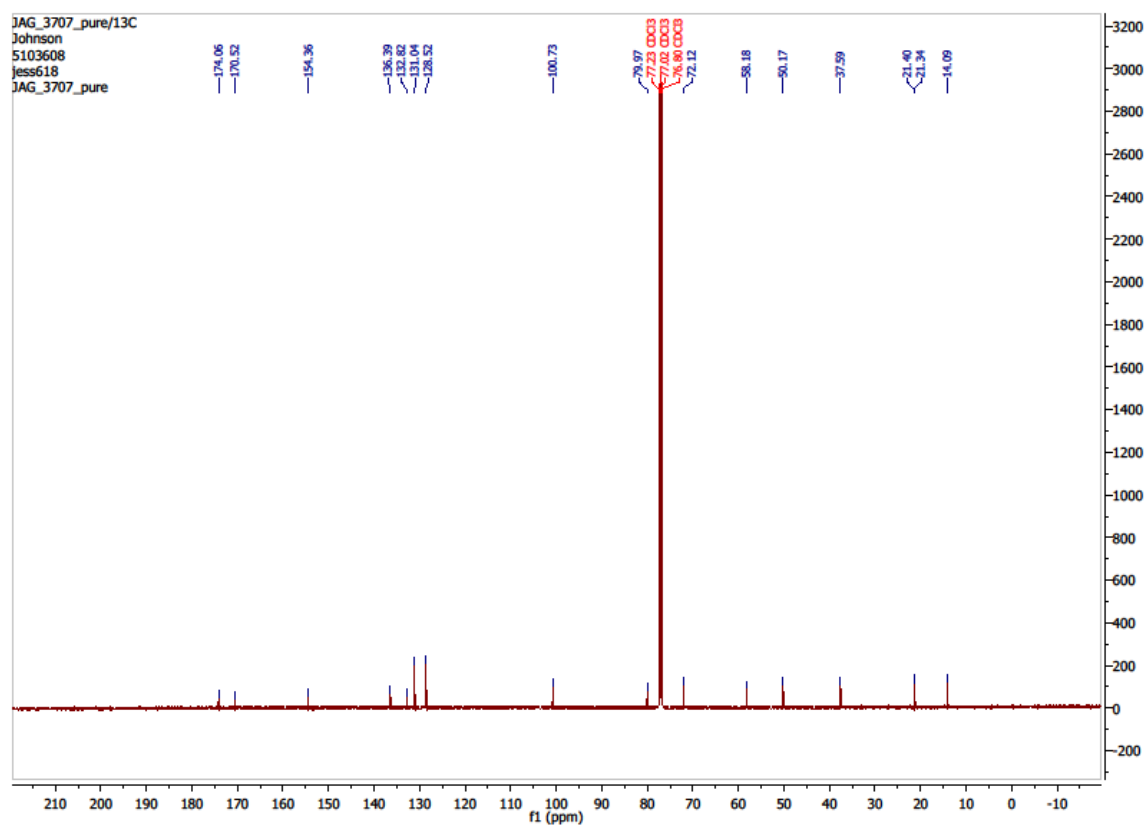

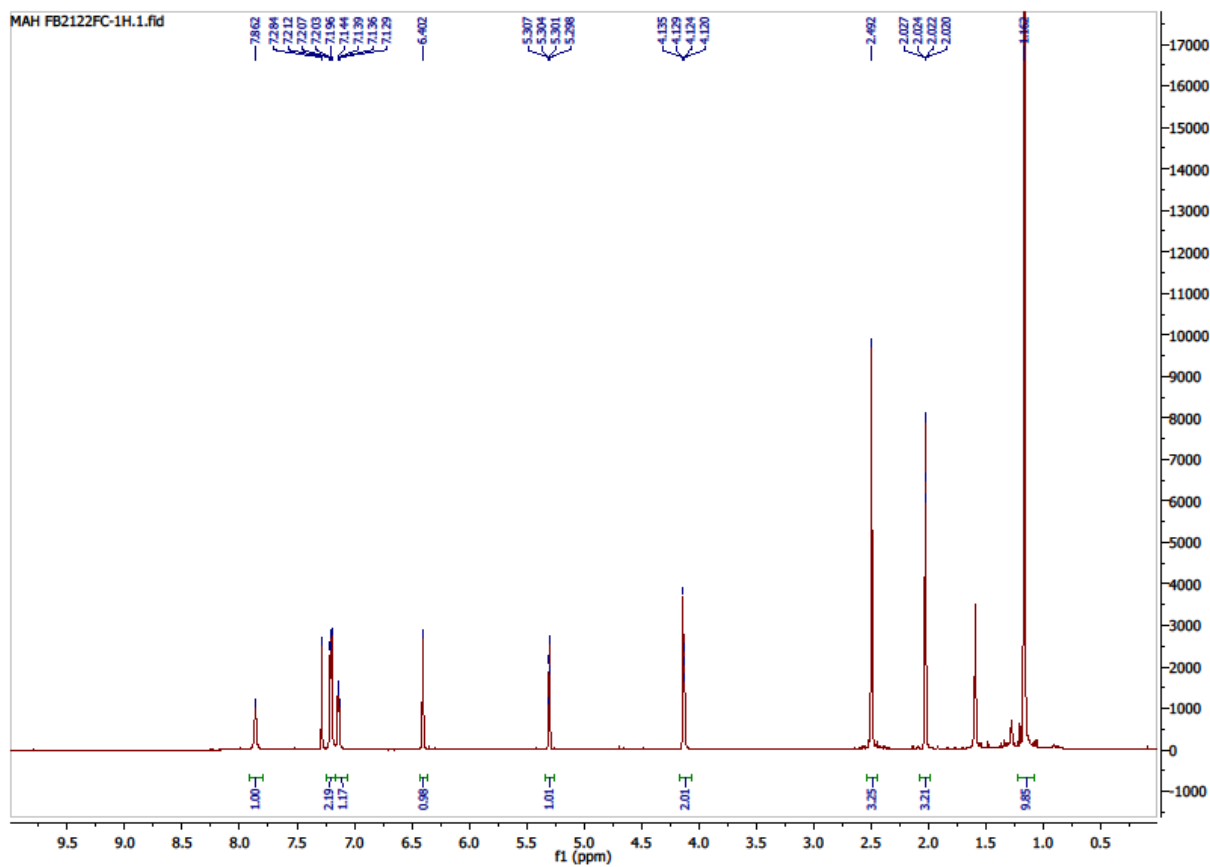

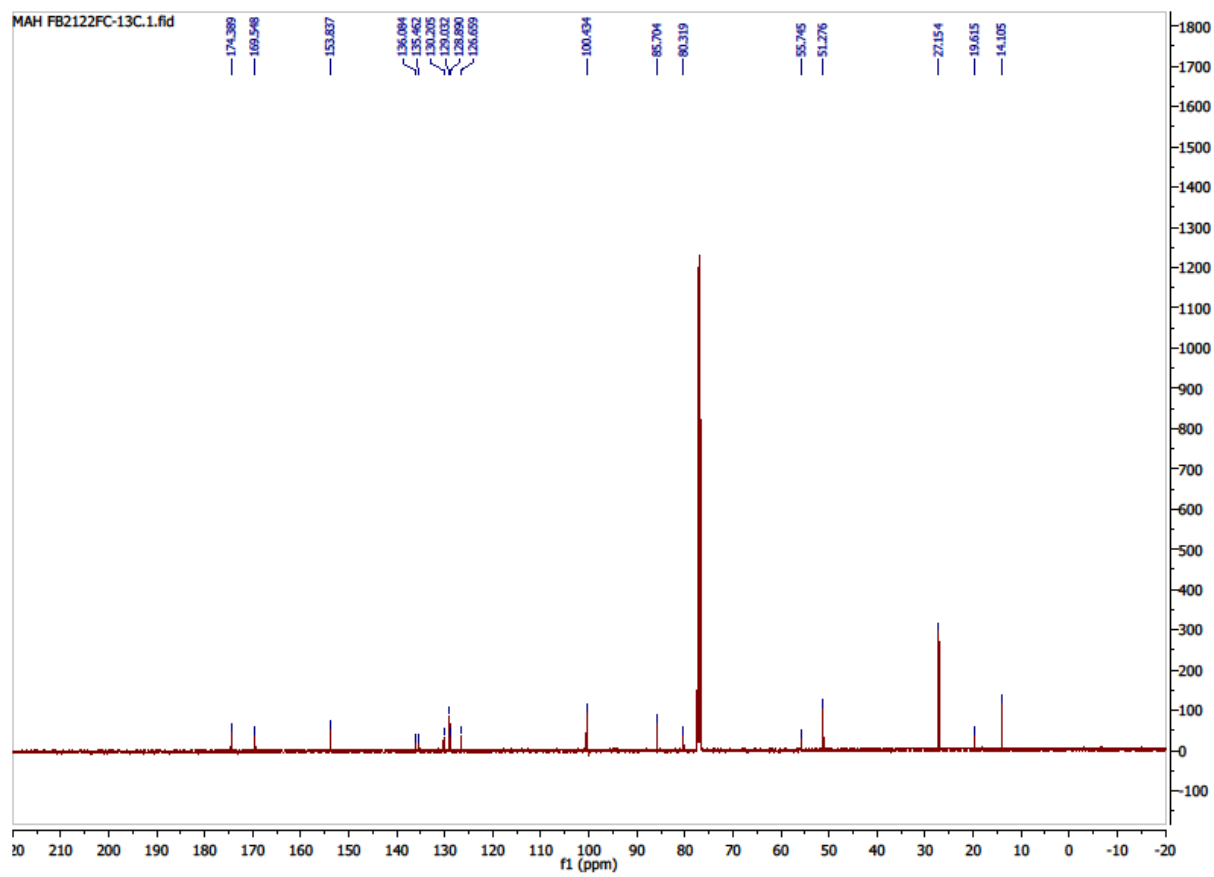

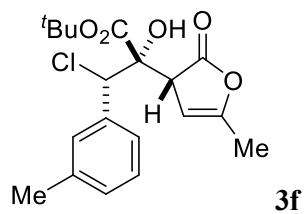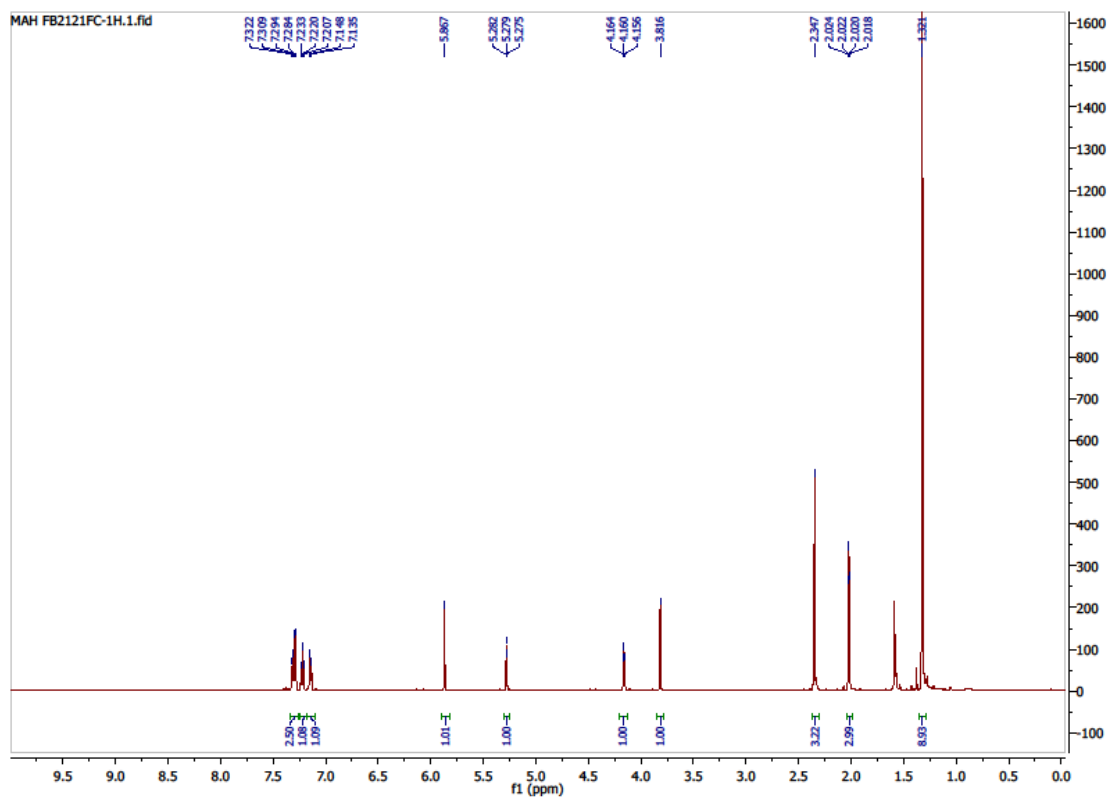

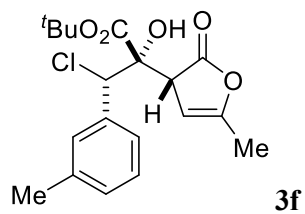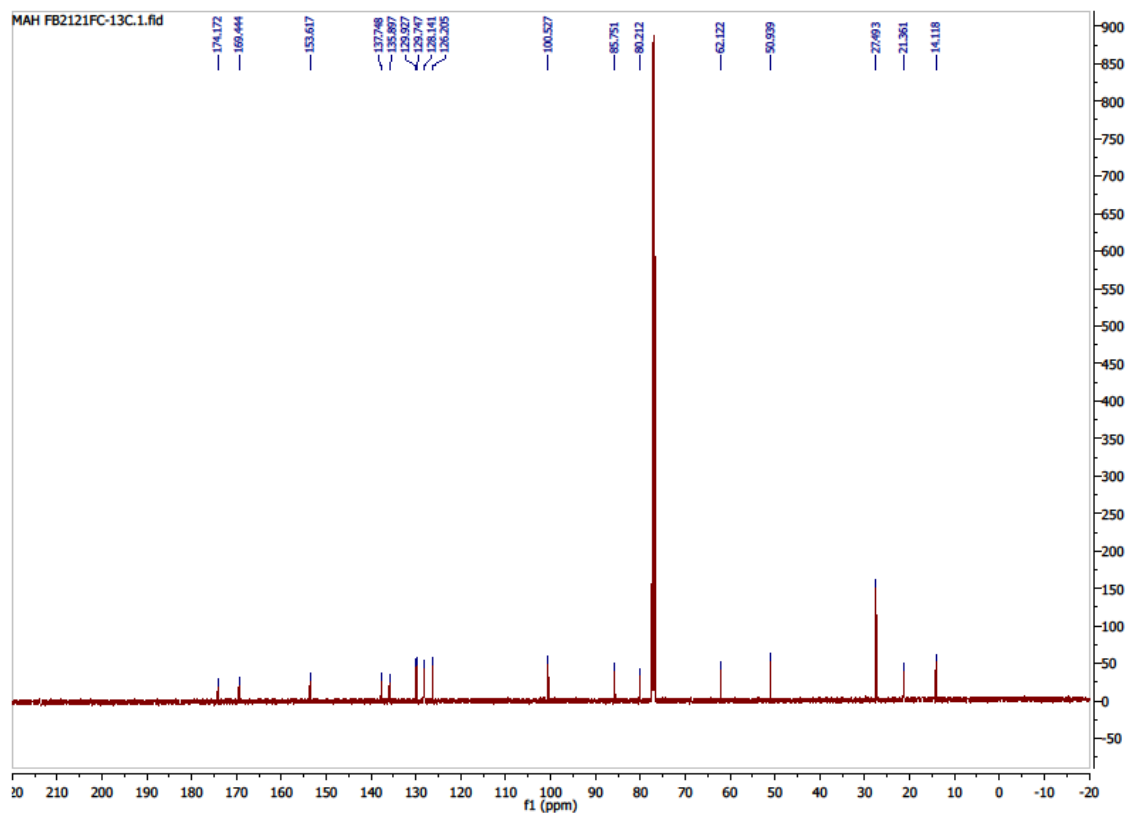

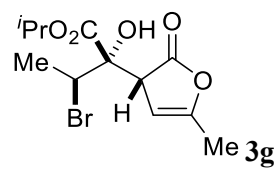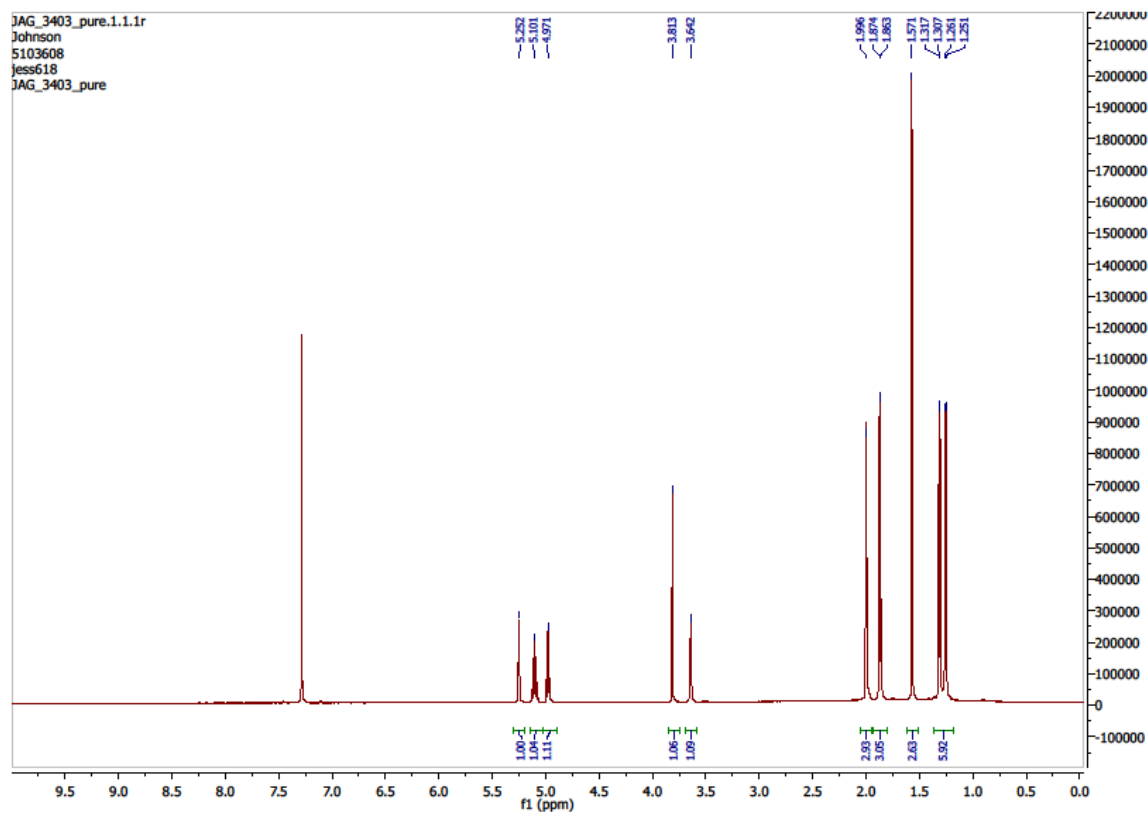



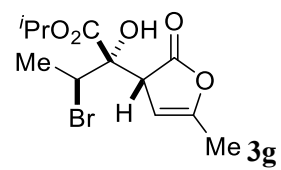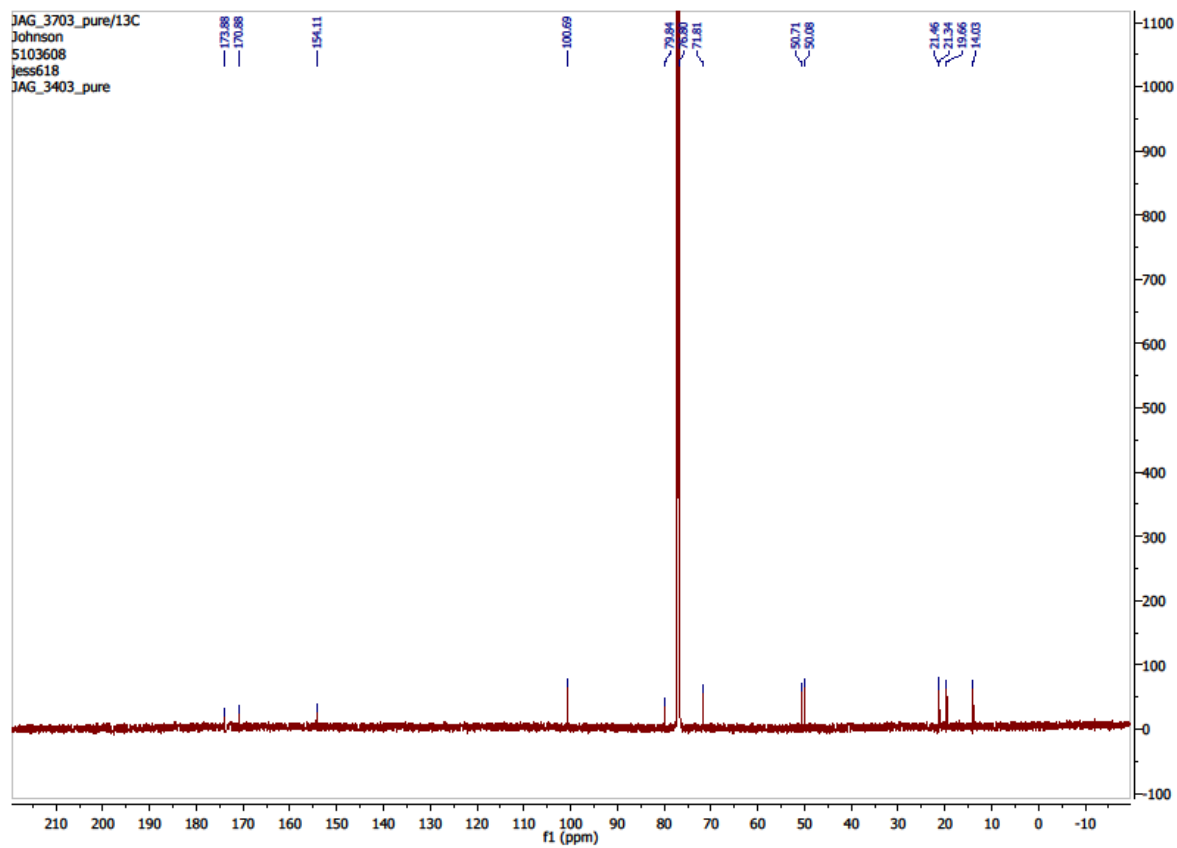

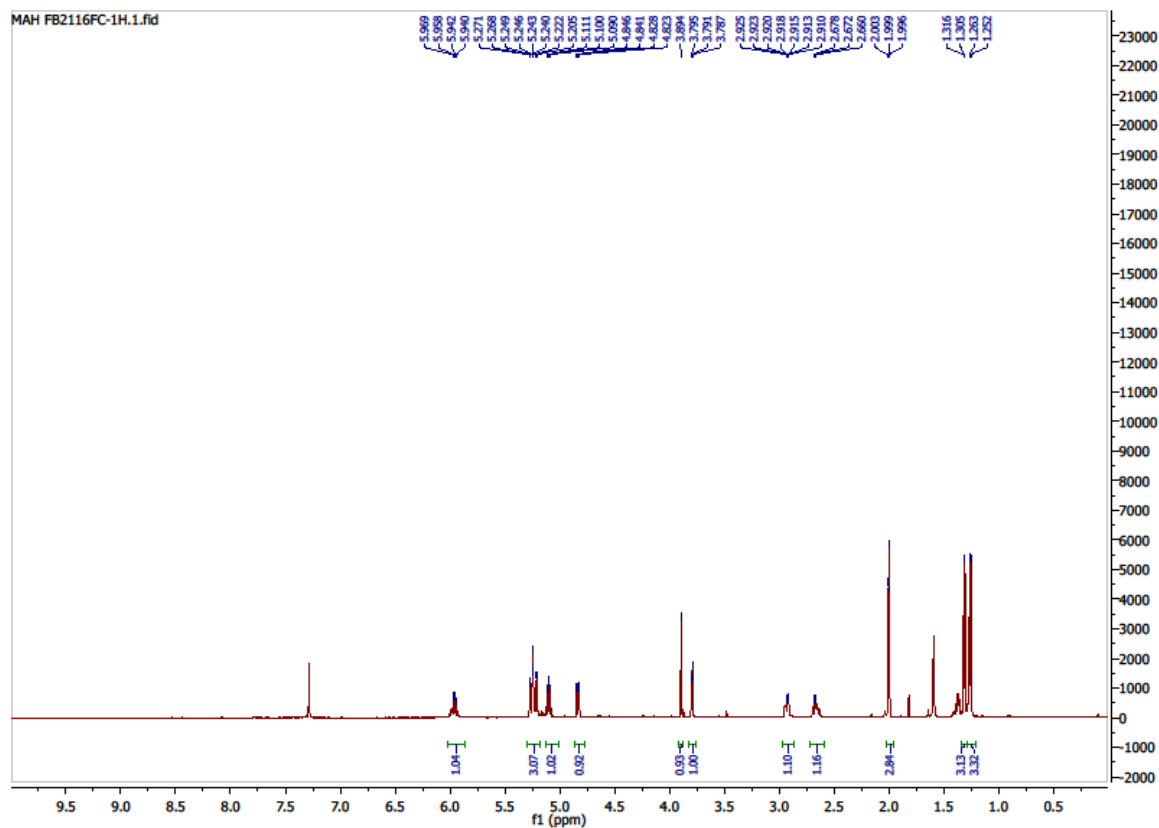

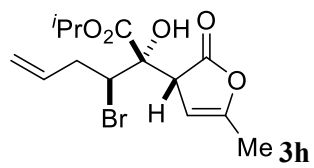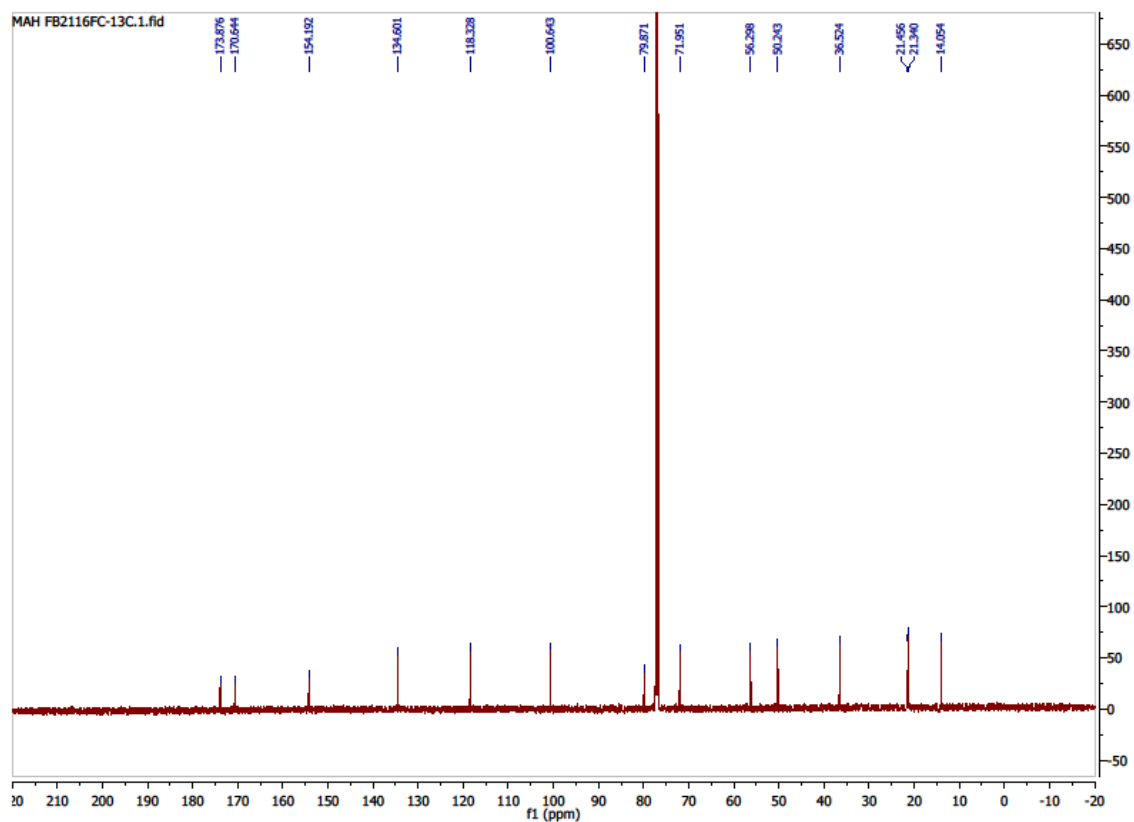

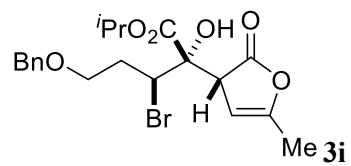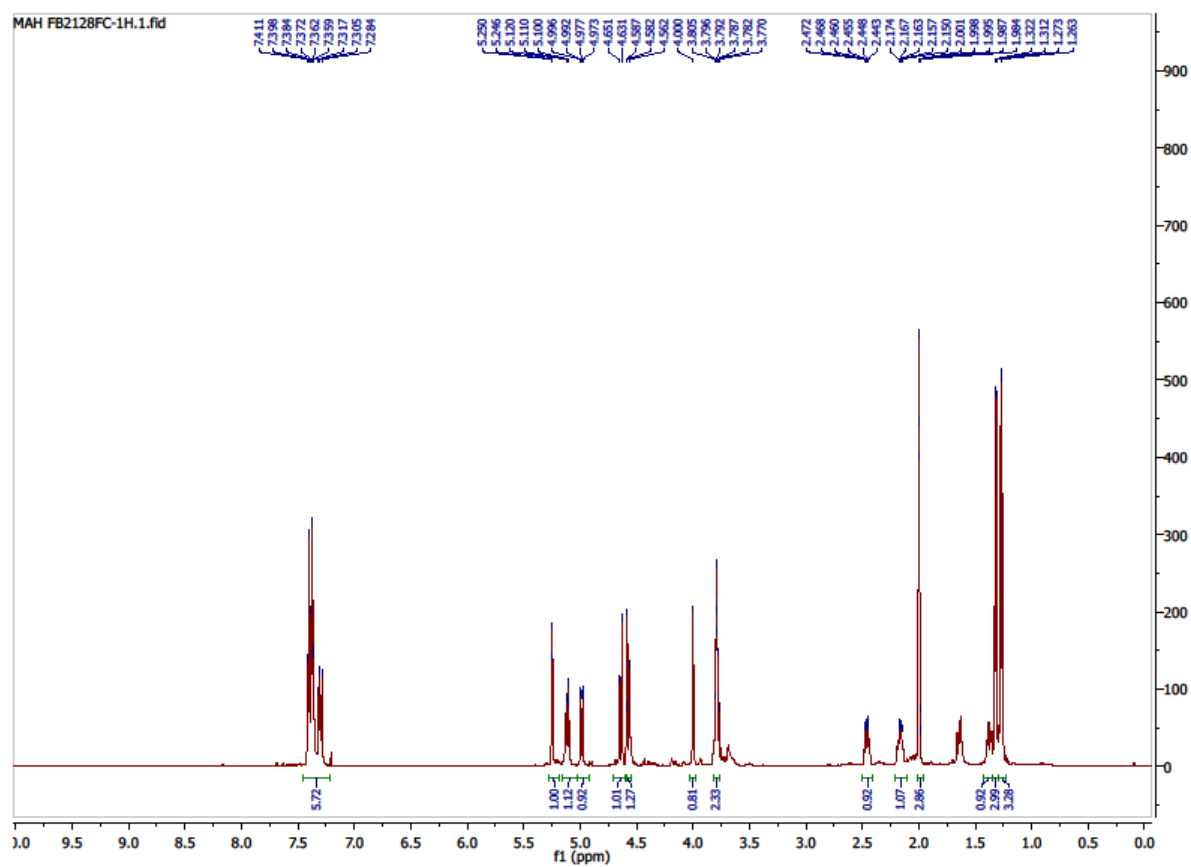

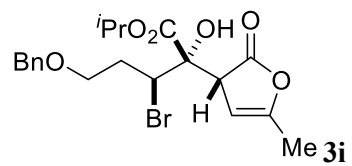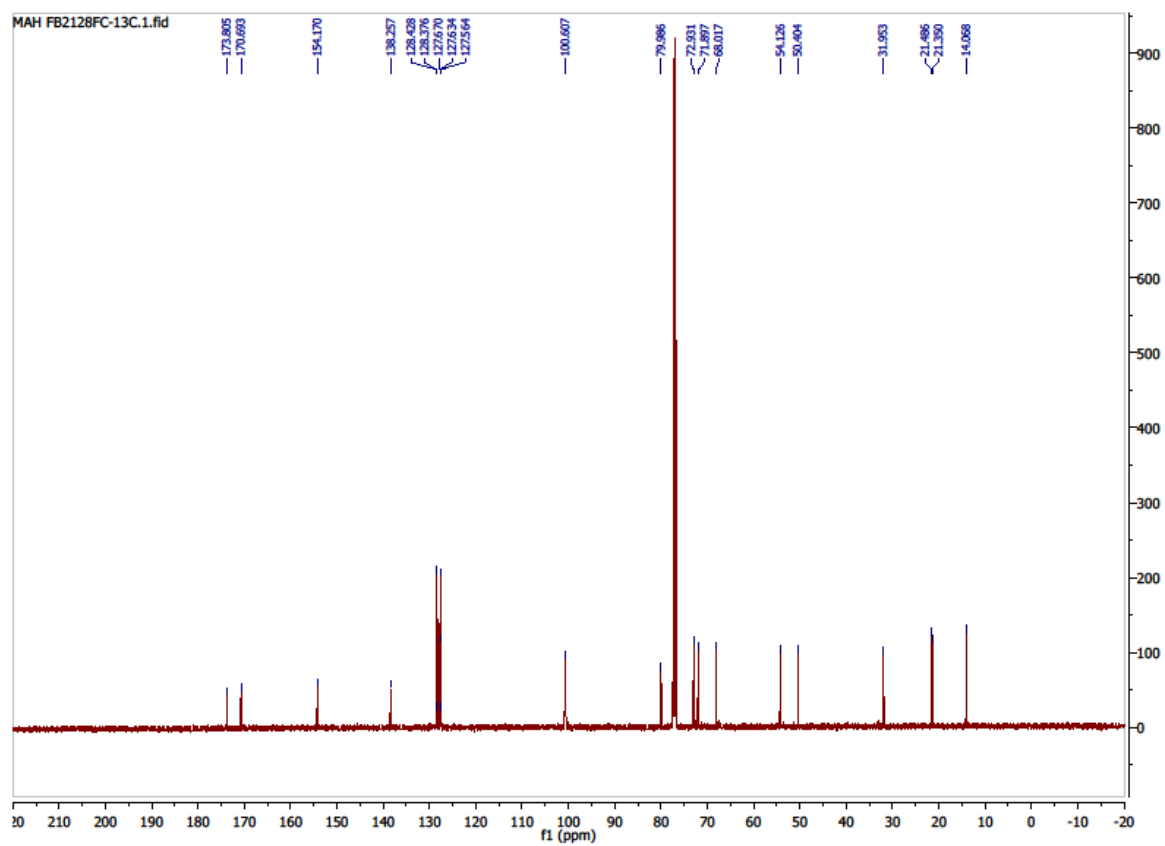

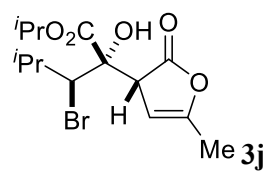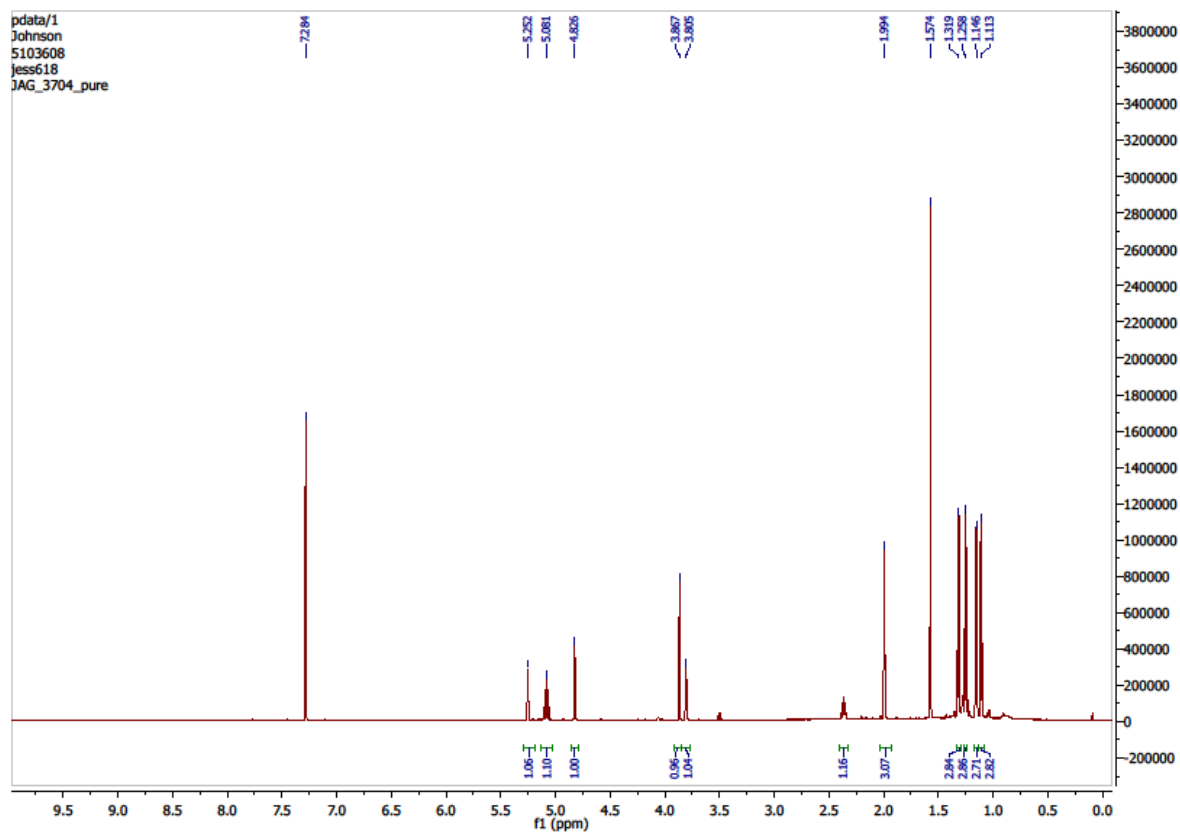

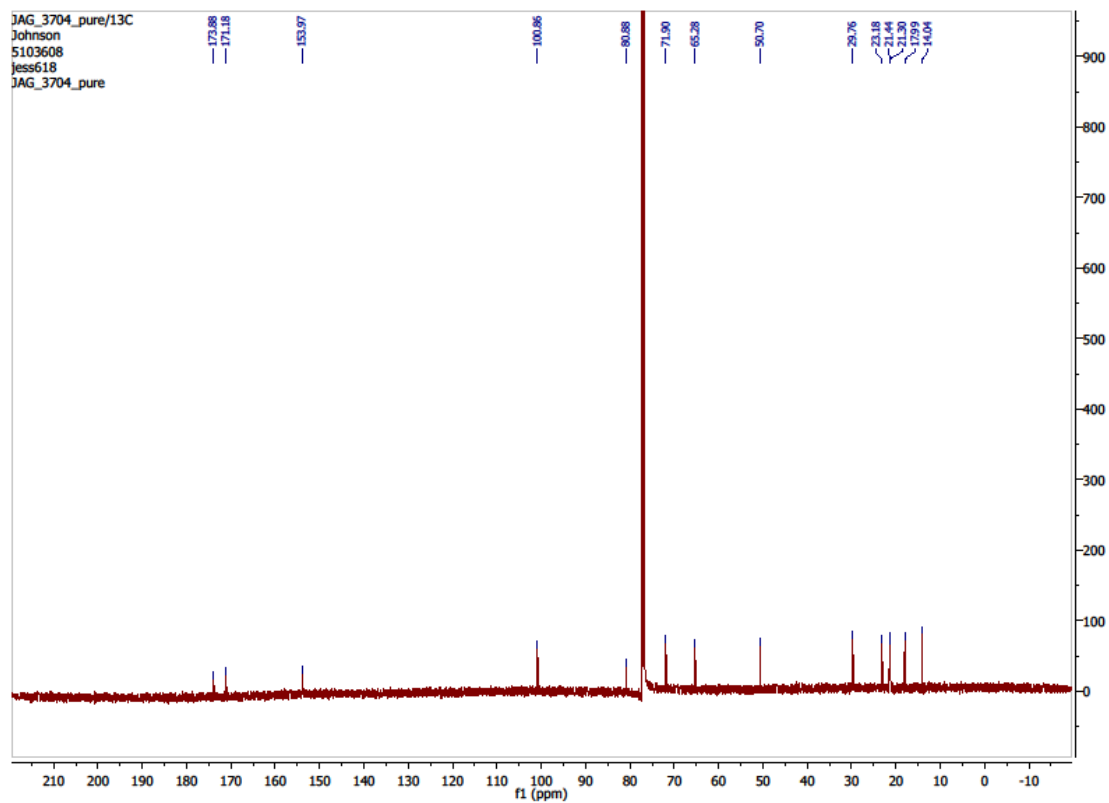

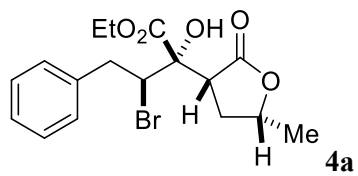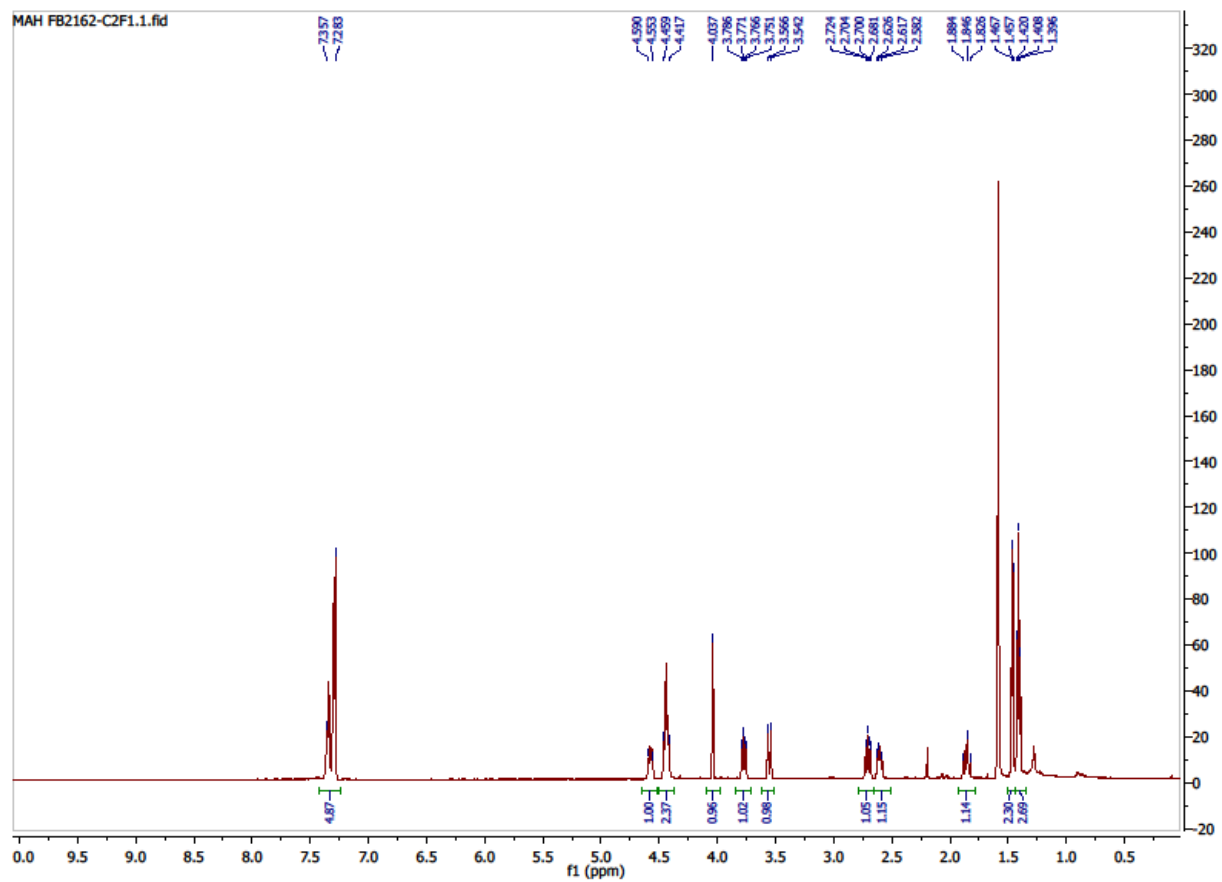



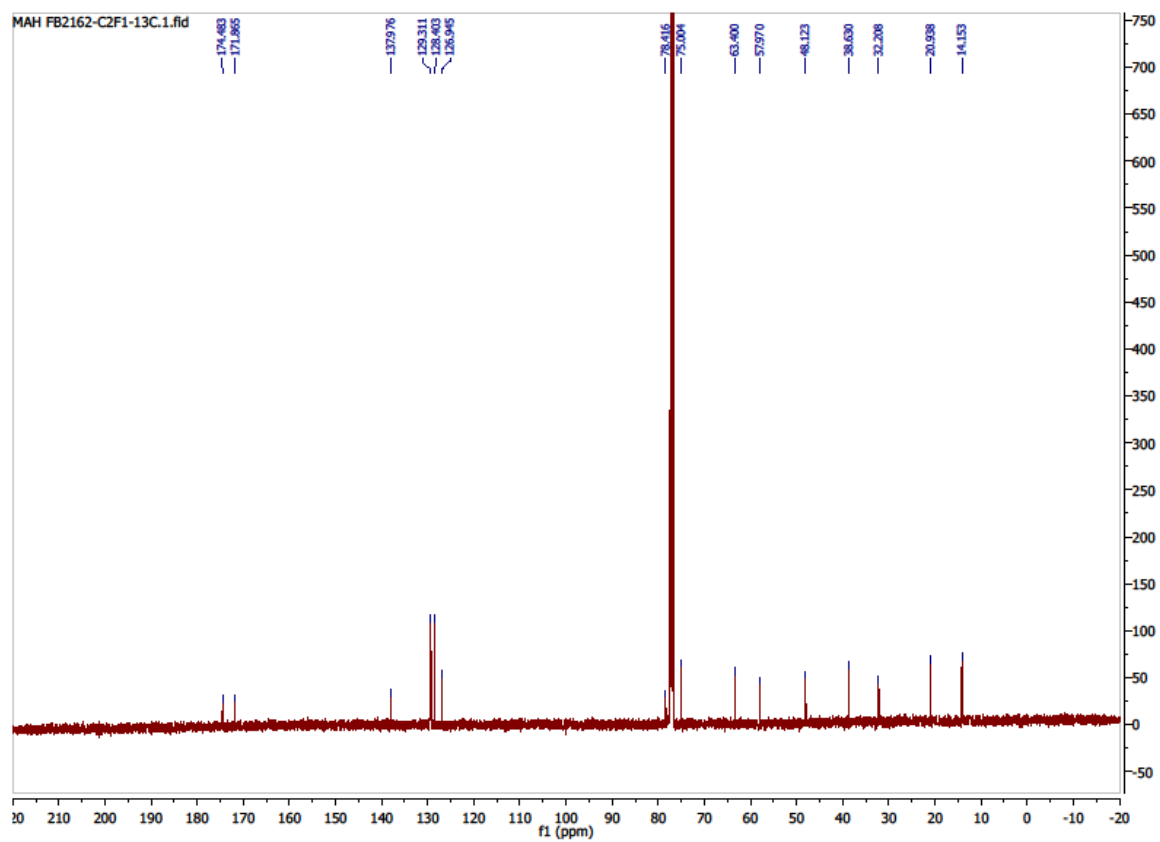

## 2D NMR experiments on 4a:

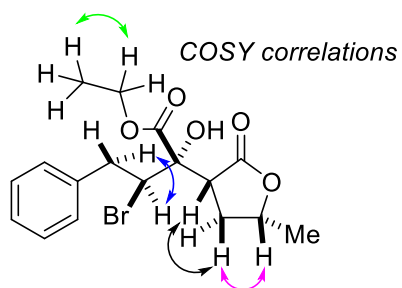

## <sup>1</sup>H COSY:

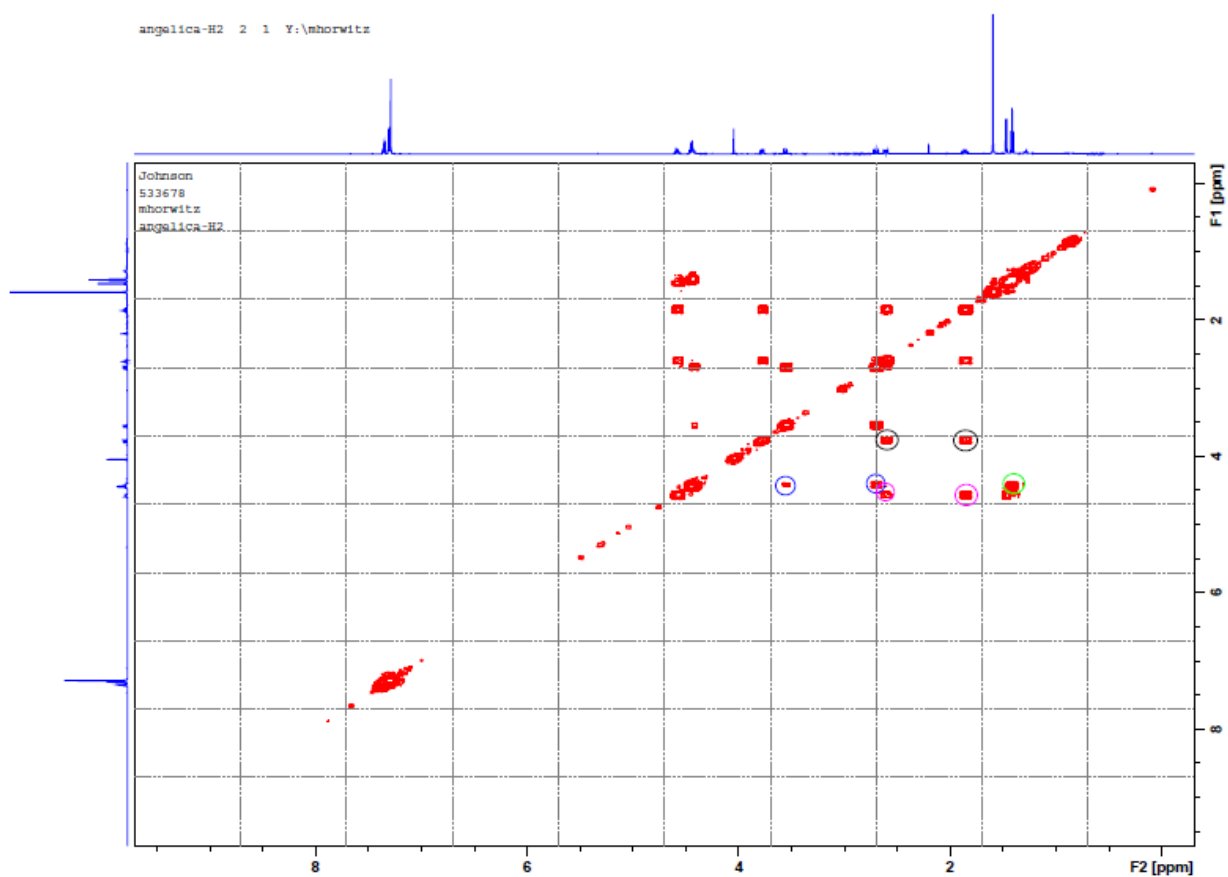

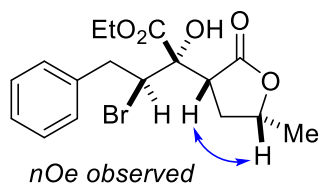

<sup>1</sup>H nOe:

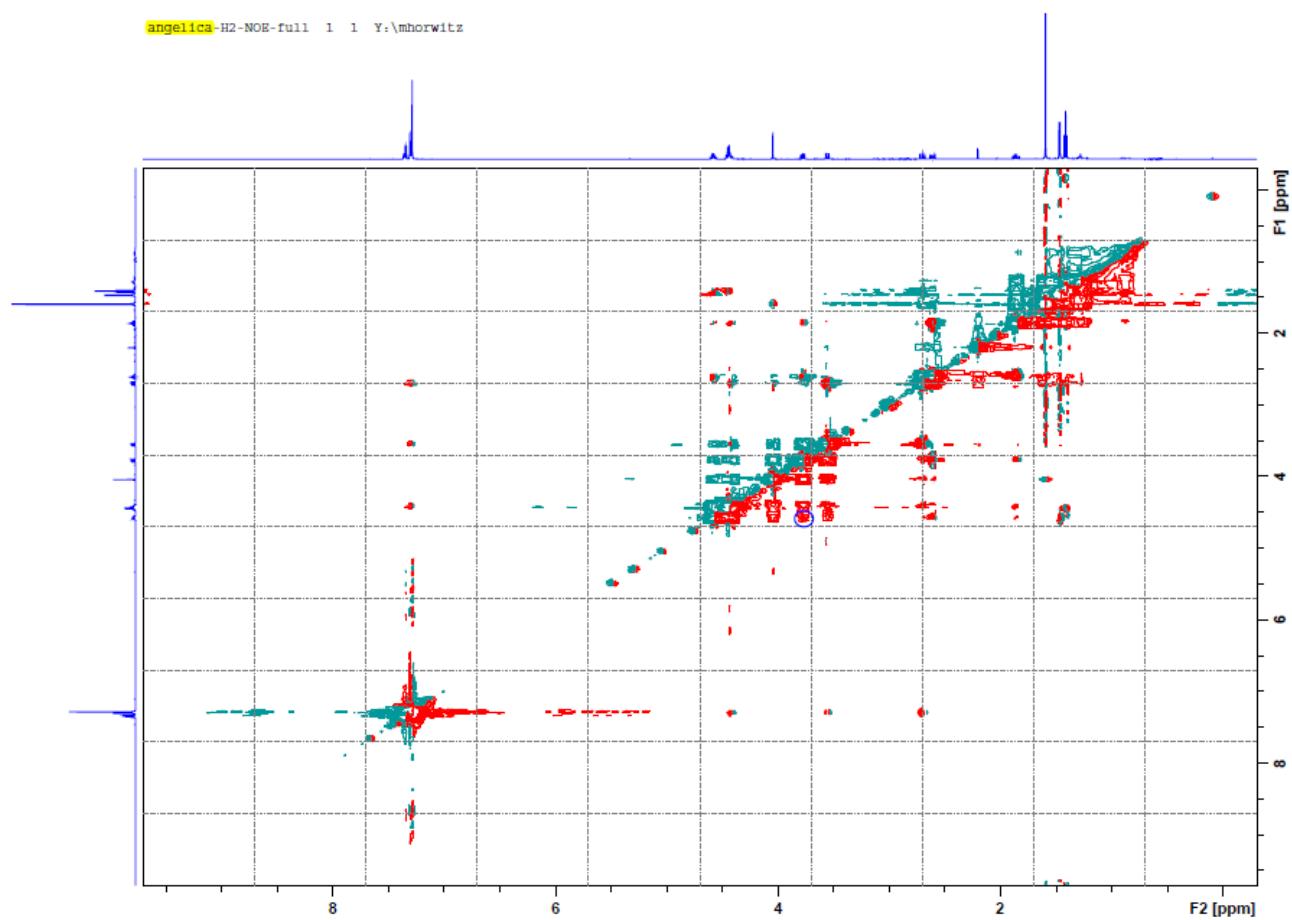

Supplement: Supplementary file 1 [file 7784761]
